# Supplementary material
Source: PubMed Central journal article supplement (PMC4692970)
Supplement: supp_btv505_supp_rev_FINAL.pdf [file supp_btv505_supp_rev_FINAL.pdf]

**Supplemental Material for:**

RASER: Reads Aligner for SNPs and Editing sites of RNA

Jaegyeon Ahn and Xinshu xiao

Supplemental Figures 1-8

Supplemental Table 1

Figure S1

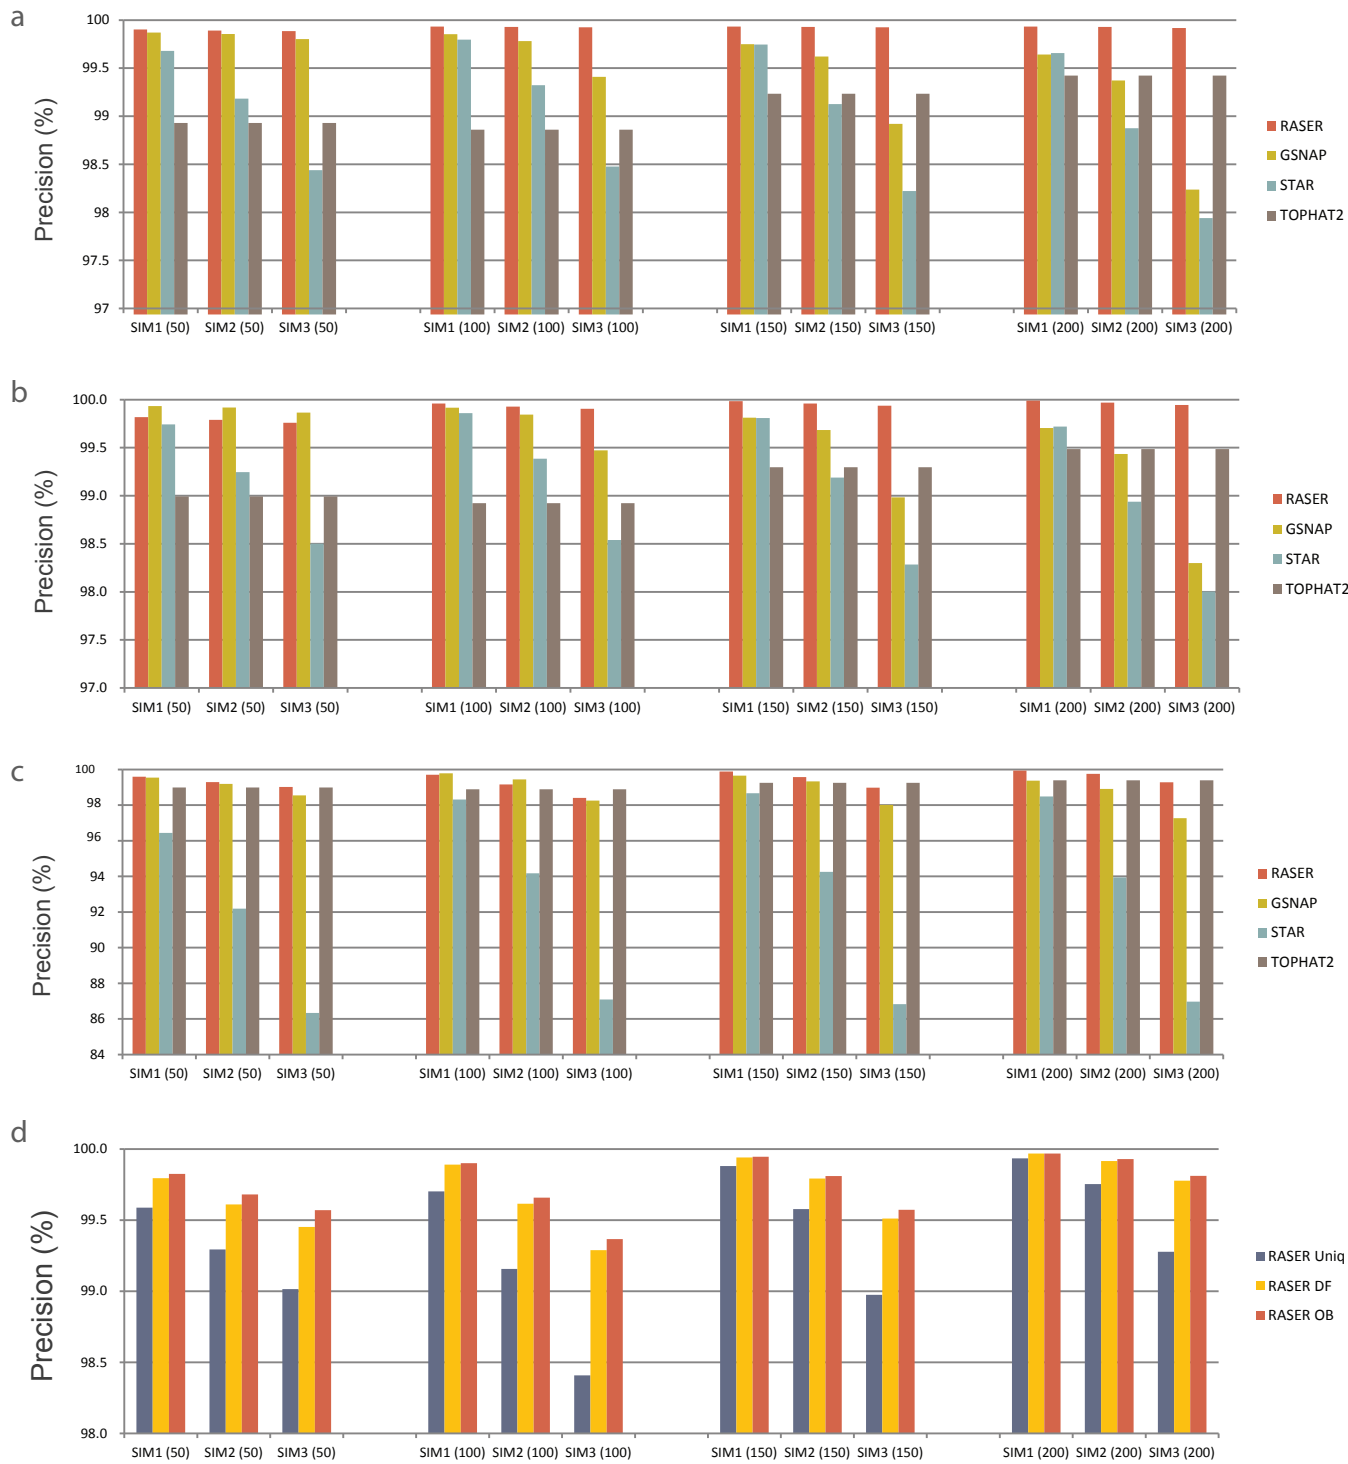

**Figure S1. Comparison of mapping performance.** (Unless otherwise noted, for all panels, “obviously best” mappings for RASER and unique mappings for other aligners were used.) (a) Comparison of precision (defined as percentage of correctly mapped reads among all mapped reads) using simulated data sets of varying levels of sequencing errors (SIM1 < SIM2 < SIM3) and read length (in parenthesis of the x axis label). The “obviously best” scheme was used for RASER. Unique mapping was required for results from the other aligners. The mapping was deemed correct if more than 50% of the nucleotides in a read were correctly mapped to their original genomic loci. (b) Similar as (a), but unique mapping by RASER is reported. (c) Similar as (b), but the mapping was deemed correct if more than 80% of the nucleotides in a read were correctly mapped to their original genomic loci. (d) Comparison of precision of RASER uniq (unique mappings only), RASER DF (double filtering scheme), and RASER OB (obviously best scheme). The mapping was deemed correct if more than 80% of the nucleotides in the reads were correctly mapped to its original genomic loci. (e) Comparison of recall of the 3 schemes of RASER as in (d). (f) Comparison of precision of NOVOALIGN and other aligners, excluding spliced junction reads from simulated reads (since NOVOALIGN does not map spliced reads). The mapping was deemed correct if more than 50% of the nucleotides in a read were correctly mapped to their original genomic loci. (g) Similar as (f), but the mapping was deemed correct if more than 80% of nucleotides in a read were correctly mapped. (h) Similar as (f), for comparison of recall of NOVOALIGN and other aligners. (i) Comparison of multiple mapping rate (defined as percentage of multiply mapped reads among all reads).

Figure S1

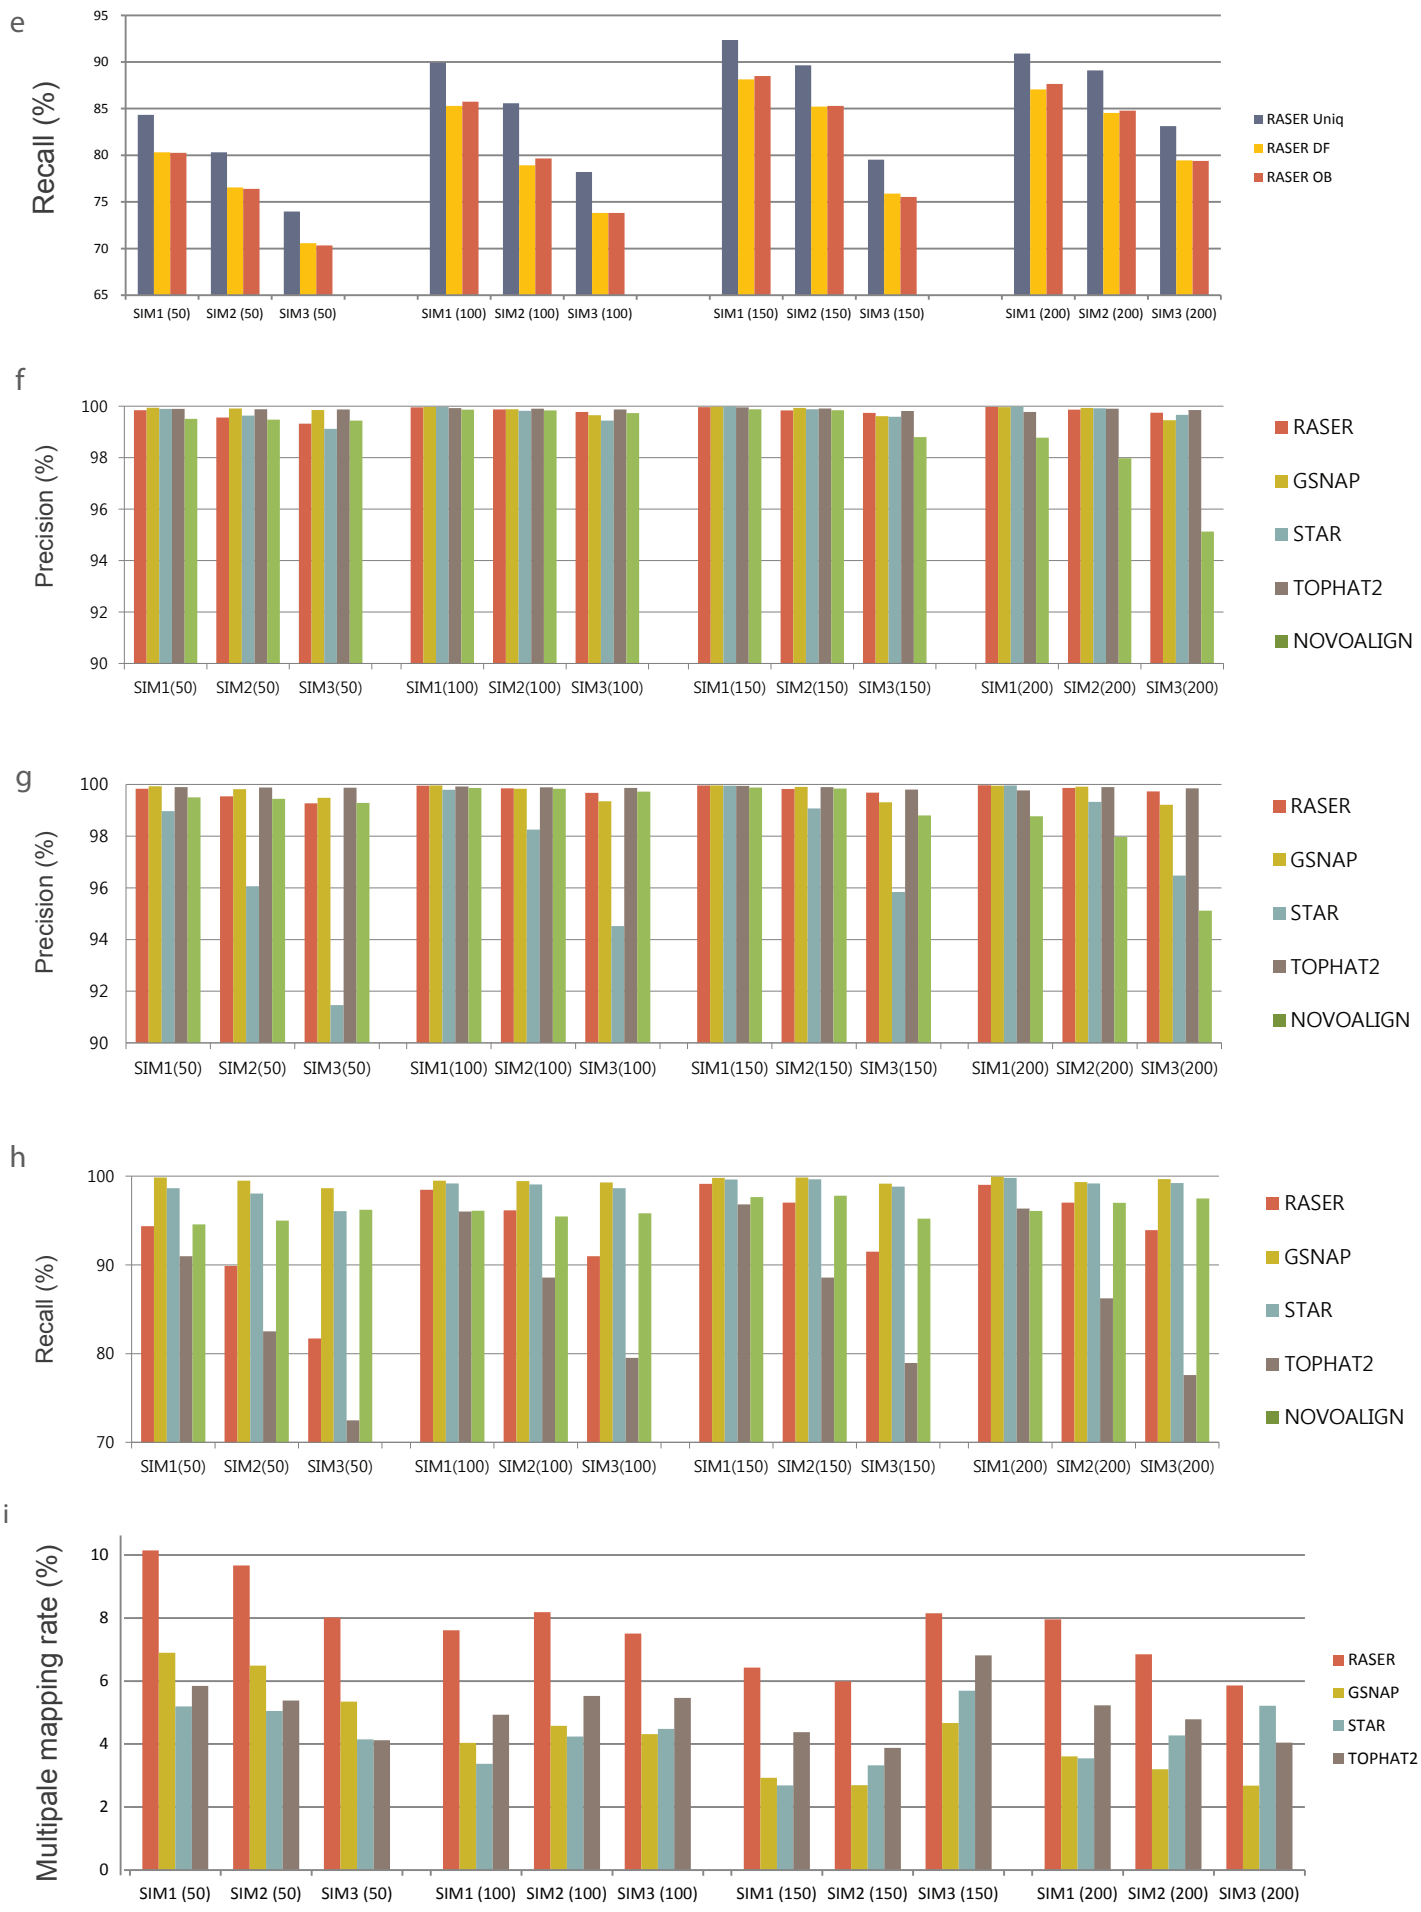

Figure S1. Comparison of mapping performance (continued)

Figure S2

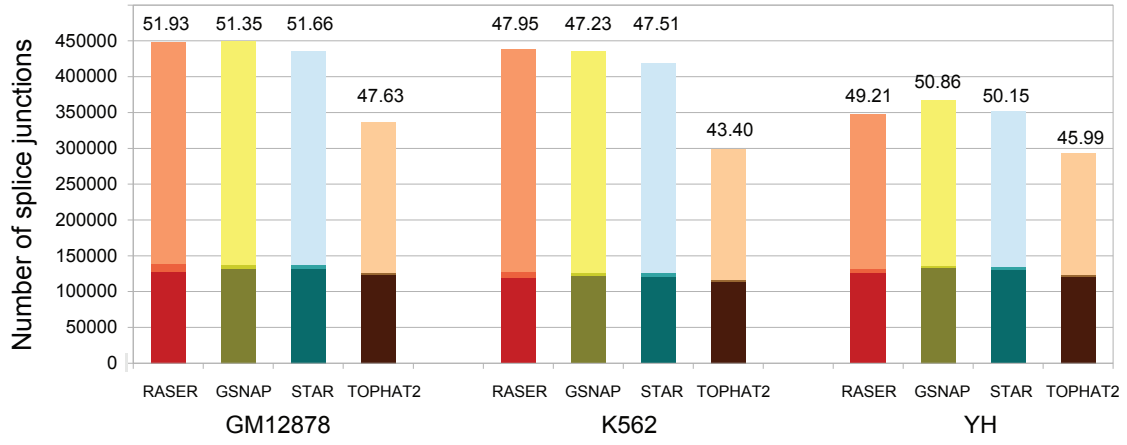

**Figure S2. Identification of spliced junctions.** Numbers of spliced junctions identified in real RNA-Seq data sets are shown. Results of each aligner are illustrated with one bar for each dataset, where the bottom (darkest color), middle (medium darkness) and top (lightest color) portions correspond to the number of perfectly matched junctions, partially matched junctions and novel junctions, respectively. Perfectly matched junctions were defined as those RNA-Seq-identified junctions that are exactly the same as Gencode v19 annotation. Partially matched junctions were those that differed from Gencode v19 annotation by less than 5 bases. Novel junctions were those that are not included in the Gencode v19 annotation. To define a junction based on RNA-Seq for all aligners, we require its read coverage being at least 3 and preference was given to canonical GT-AG or GC-AG splice sites. The numbers (%) above the bars represent the recall rate, which is defined as (number of perfectly or partially matched junctions / total number of junctions in Gencode v19 annotation).



Figure S3

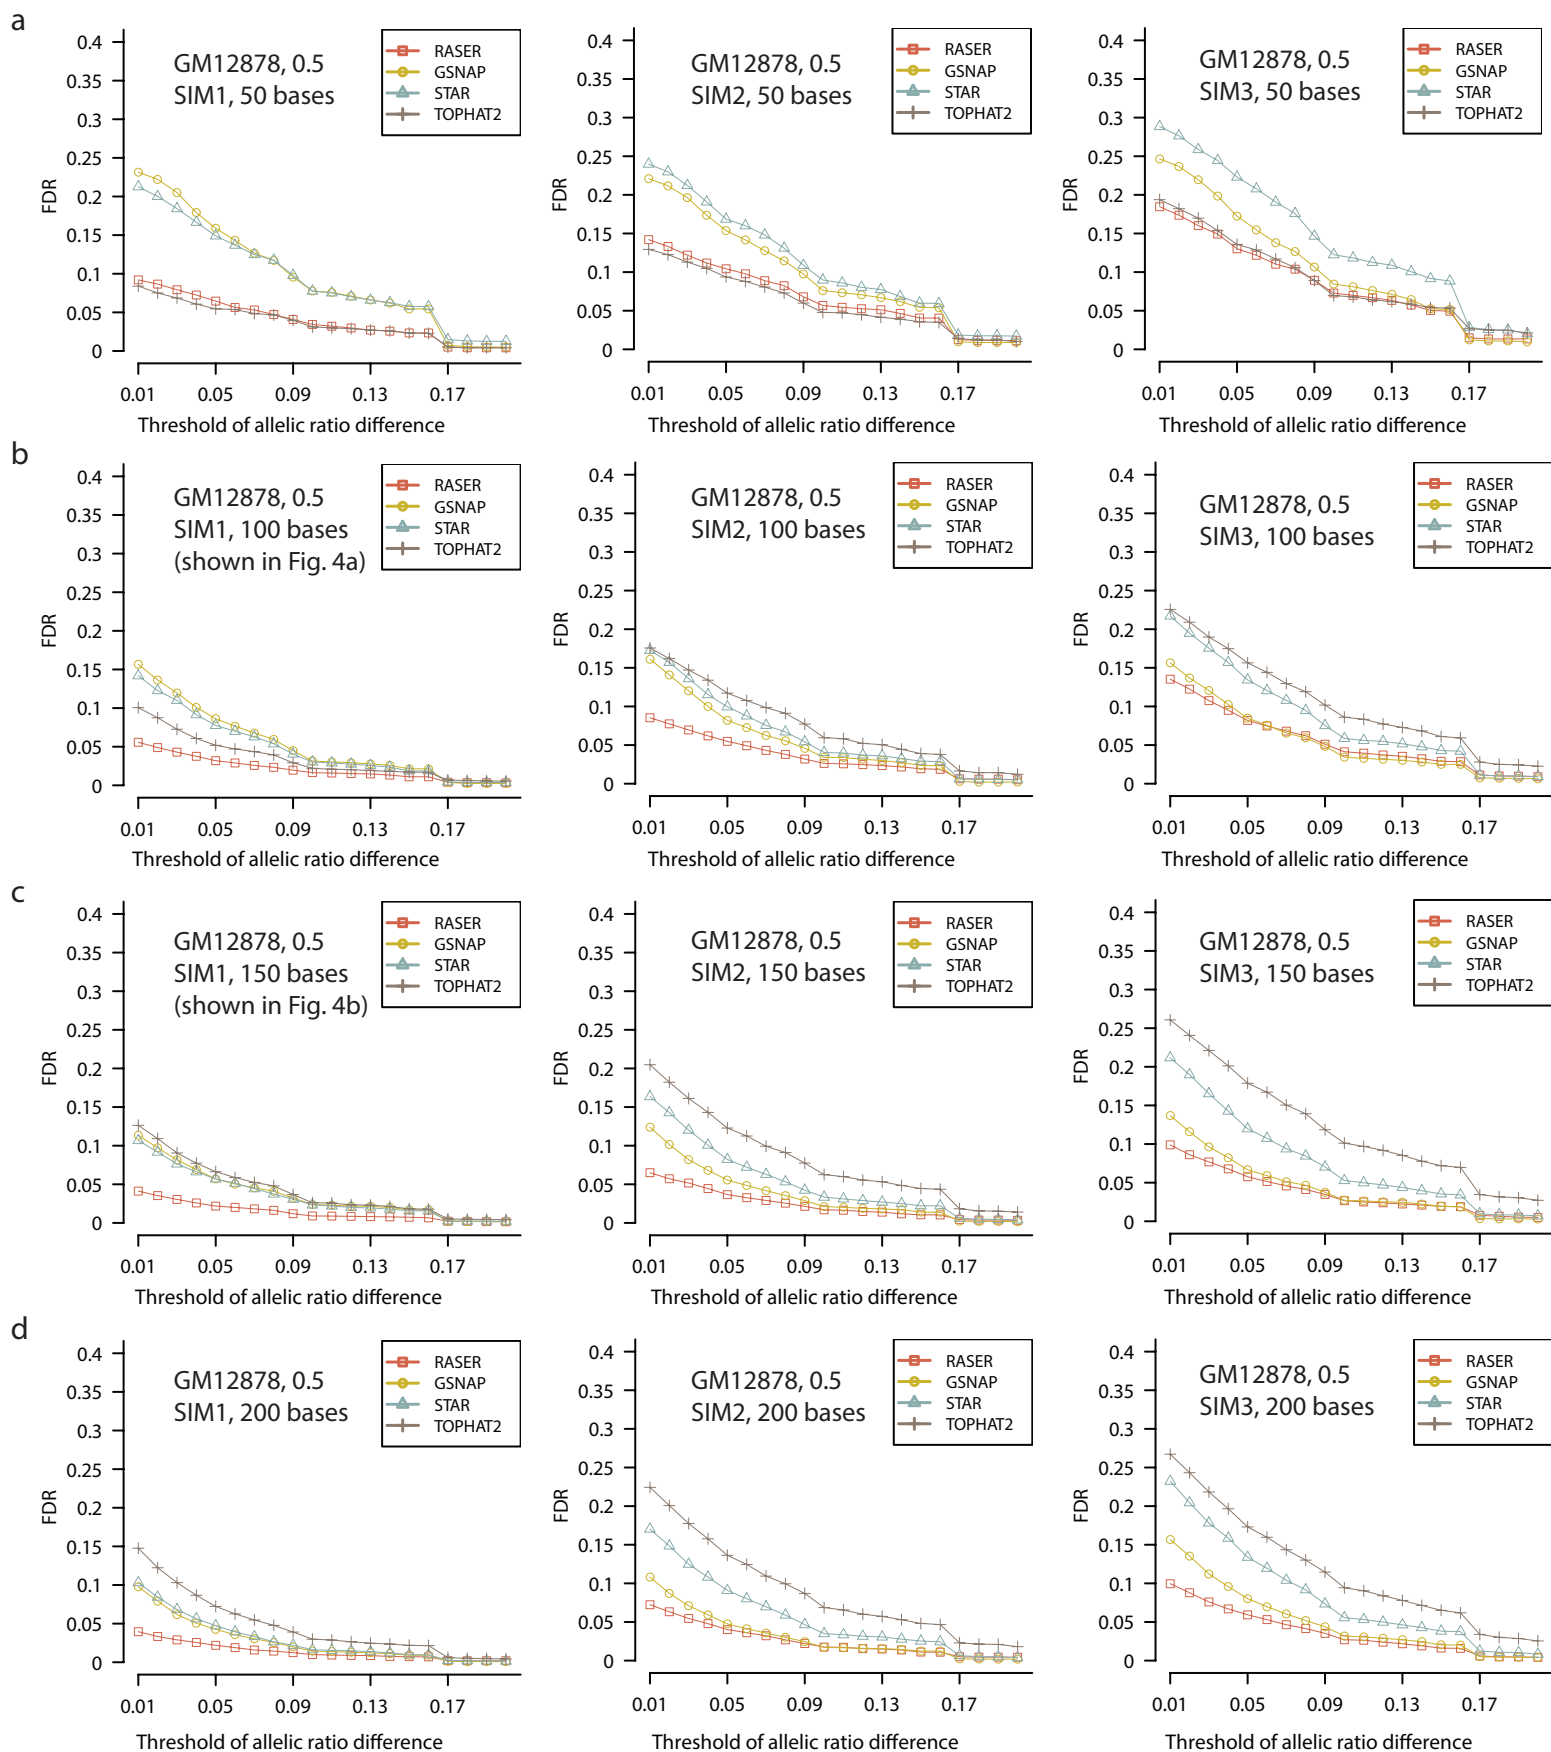

**Figure S3. False discovery rate in the quantification of allelic ratios of SNPs expressed in RNA-Seq.** SNPs in the GM12878 and YH samples which had corresponding whole genome sequencing data were implanted into the simulation data of 50, 100, 150 and 200 bases in length. SIM1, SIM2 and SIM3 data were used for the plots in the first, middle and last column, respectively. For each read that contains a known SNP, the probability for the SNP to have the reference or alternative allele was set to be 0.5, 0.75 and 0.25. This allelic ratio is defined as (number of reads containing the reference allele / total number of reads covering the SNP). The allelic ratio difference of this SNP is defined as the absolute difference between its observed allelic ratio and the simulated allelic ratio. At different thresholds of allelic ratio difference (0 to 0.2, x-axis), the FDR of SNP quantification is defined as  $FP / (FP + TP)$ , where FP and TP are numbers of false and true positives, respectively. At each threshold, a given SNP is defined as a true positive if its allelic ratio difference is less than the threshold; otherwise, this SNP is a false positive. RASER was used with the

Figure S3

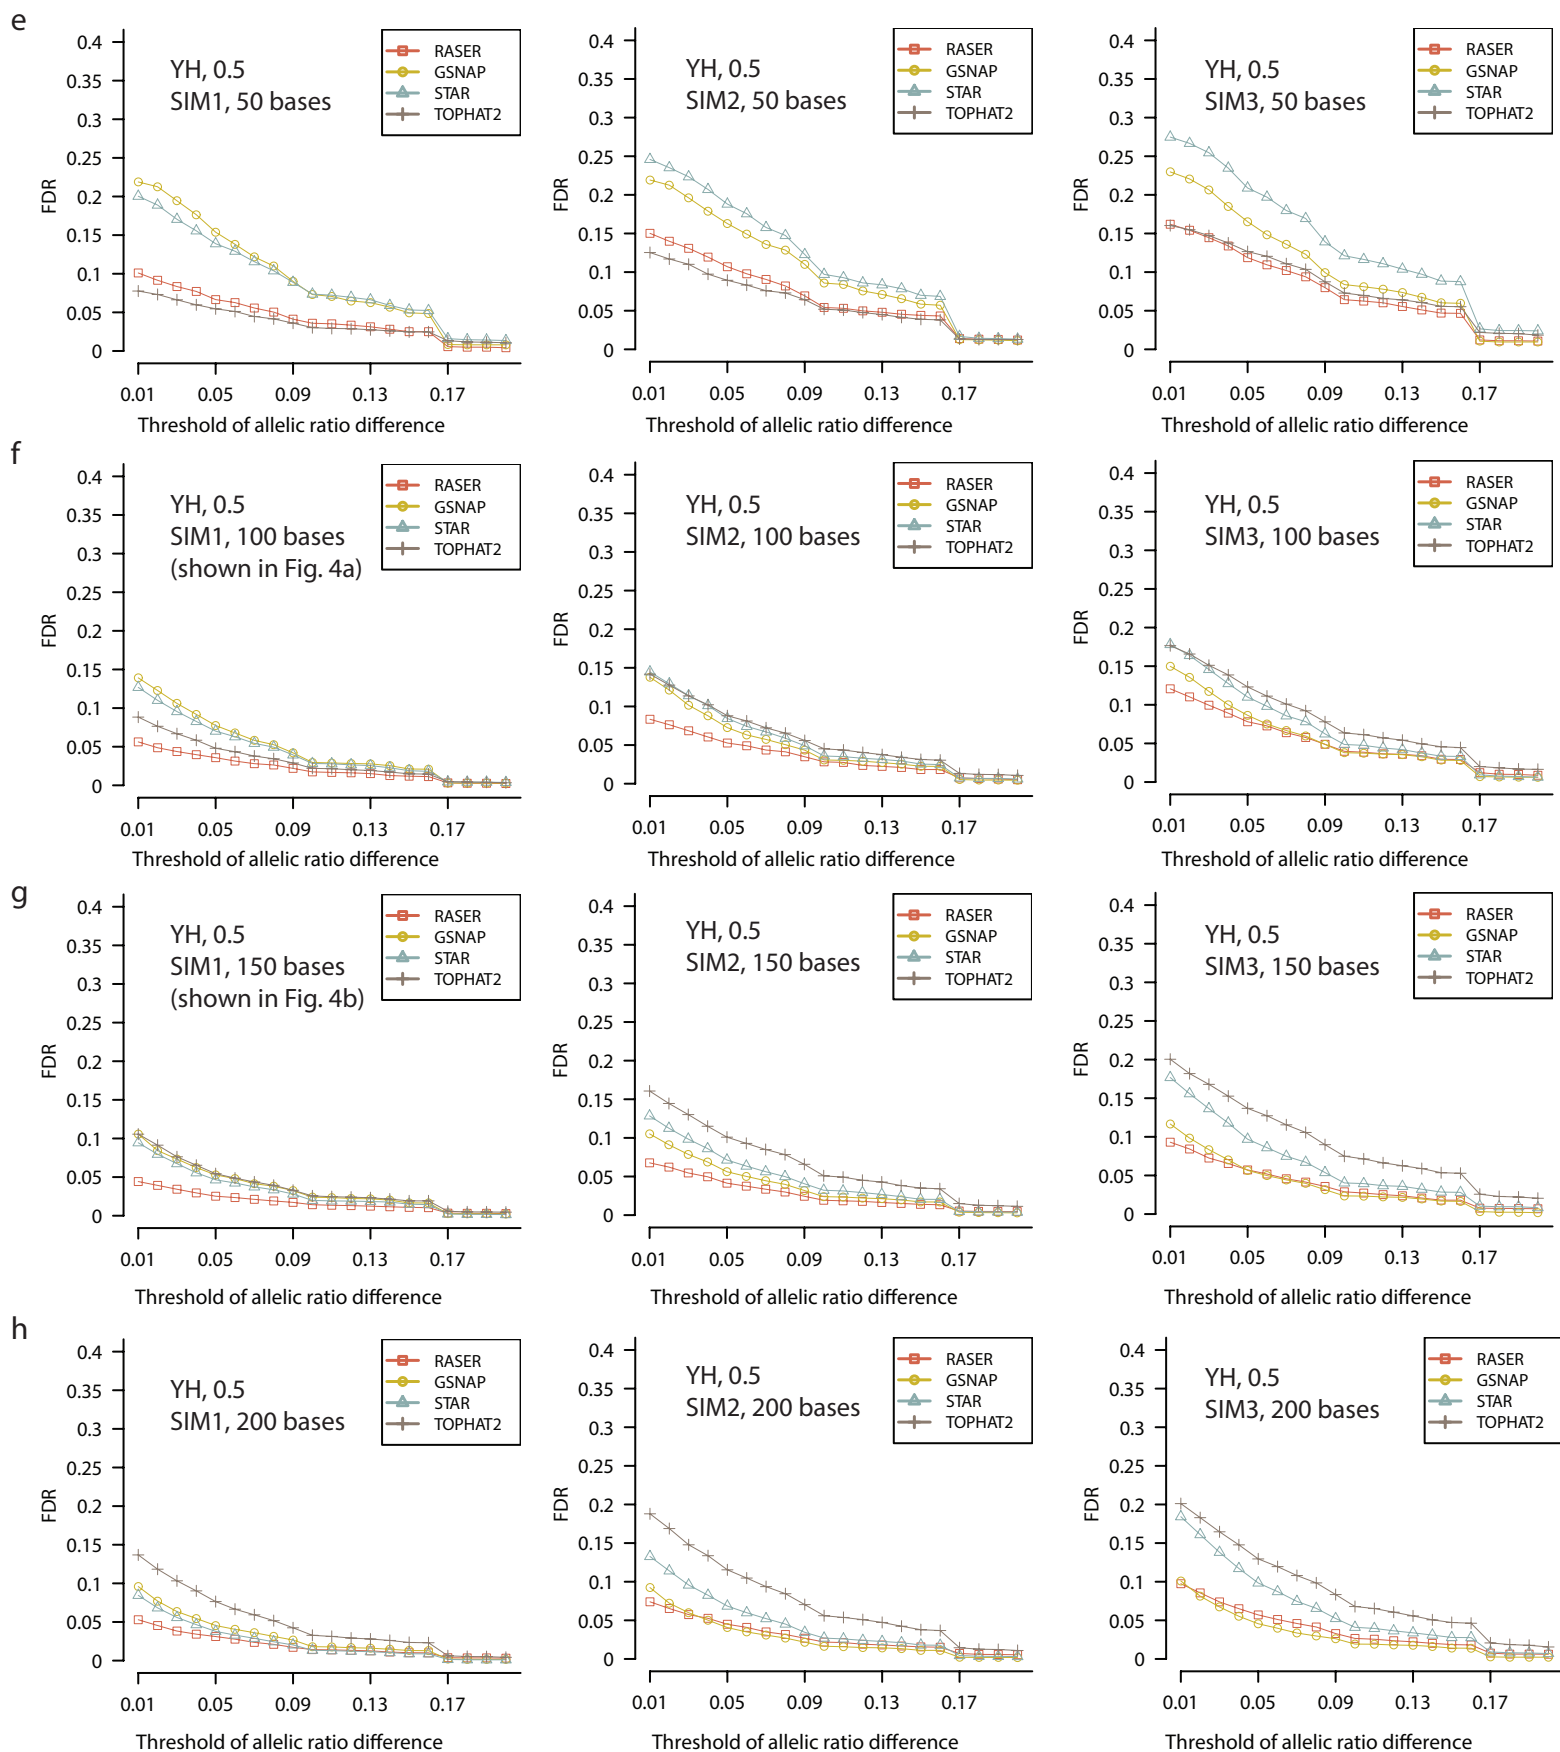

**Figure S3. False discovery rate in the quantification of allelic ratios of SNPs expressed in RNA-Seq (continued).** "obviously best" scheme; other aligners reported uniquely mapped reads. Each panel is labeled to show the corresponding SNPs (GM12878 or YH), simulated allelic ratio, simulation data set (SIM1, SIM2 or SIM3) and read length (50, 100, 150 or 200) used to generate the corresponding plot.

Figure S3

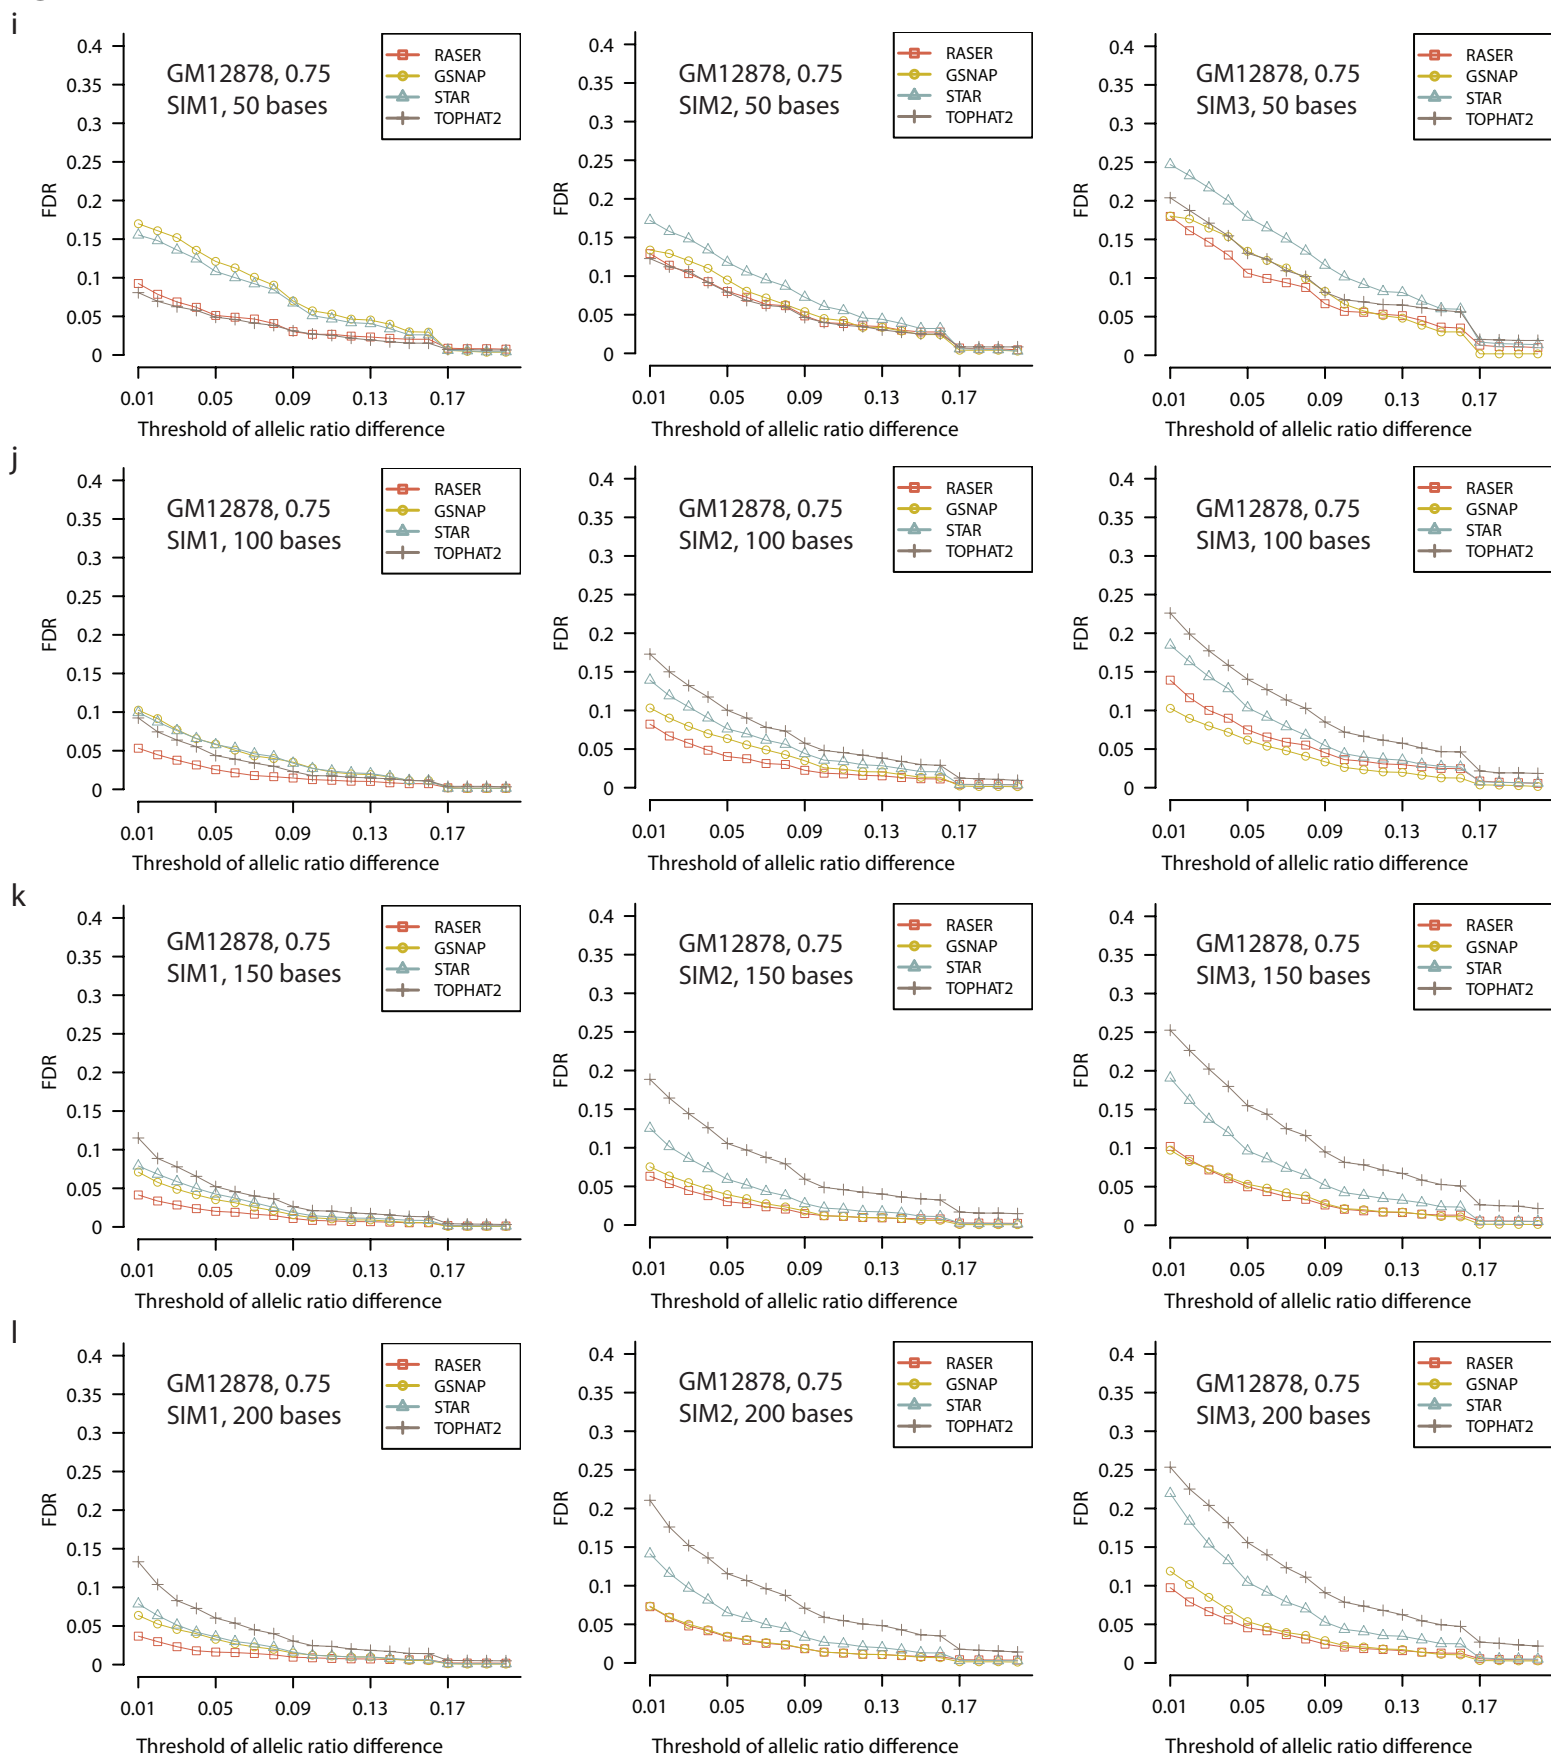

Figure S3. False discovery rate in the quantification of allelic ratios of SNPs expressed in RNA-Seq (continued).

Figure S3

m

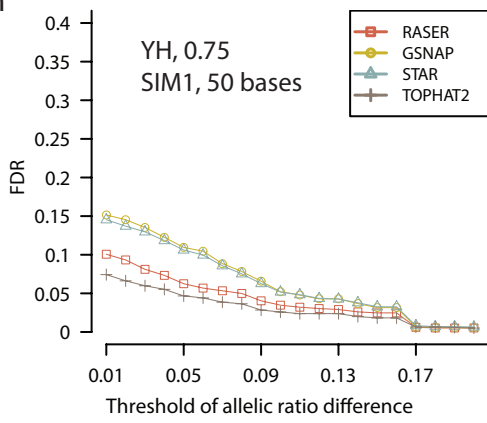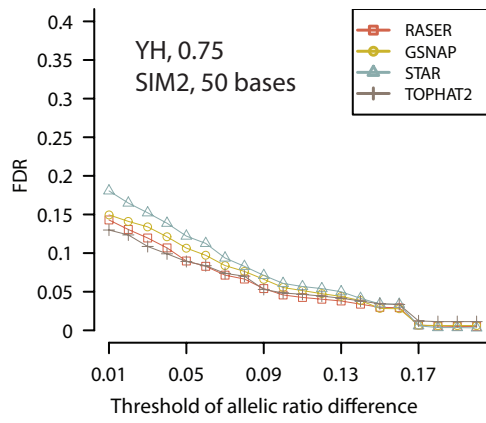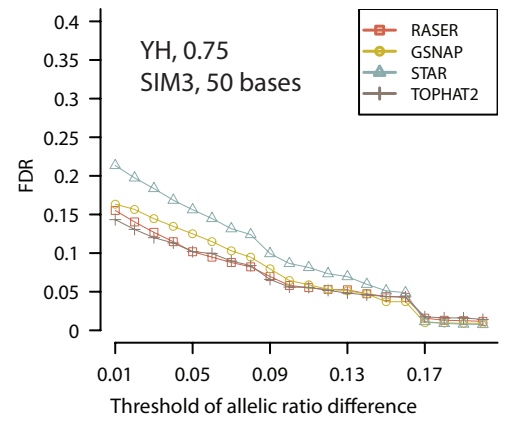

n

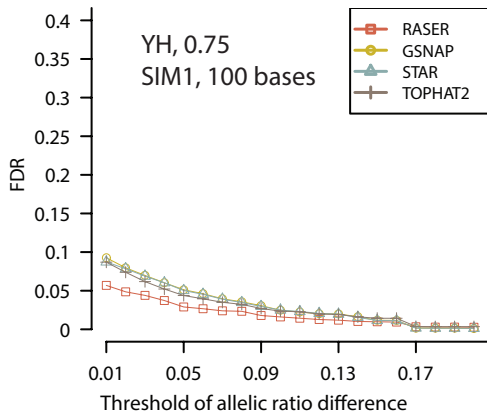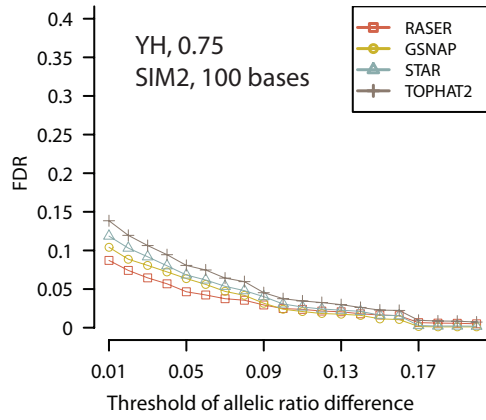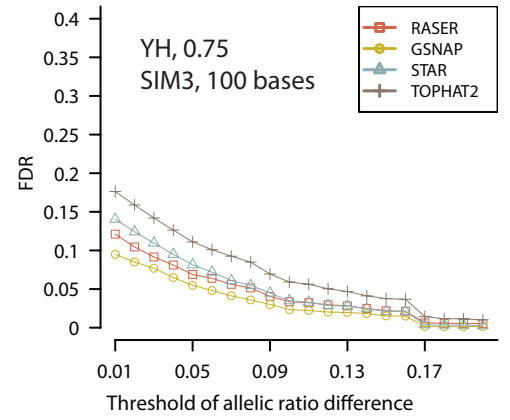

o

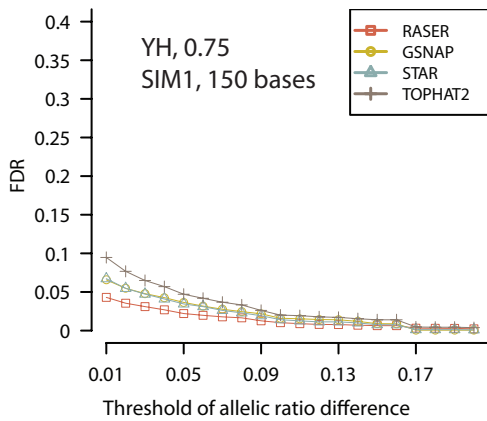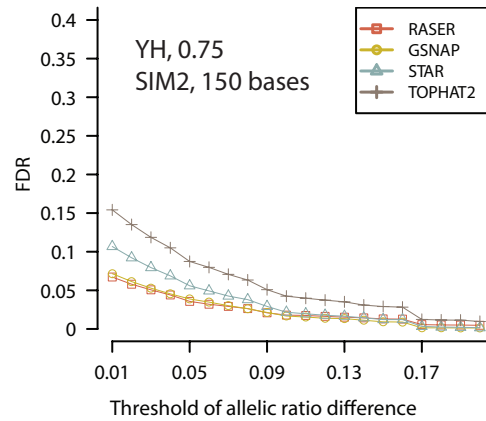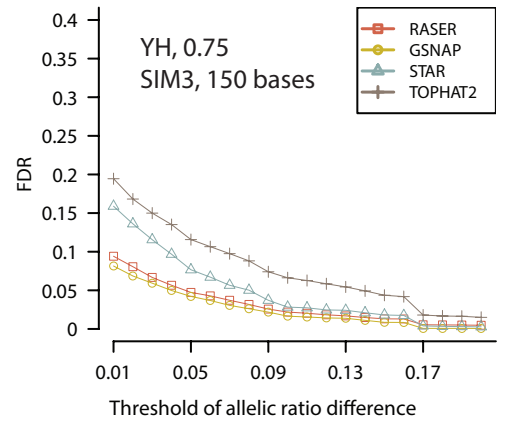

p

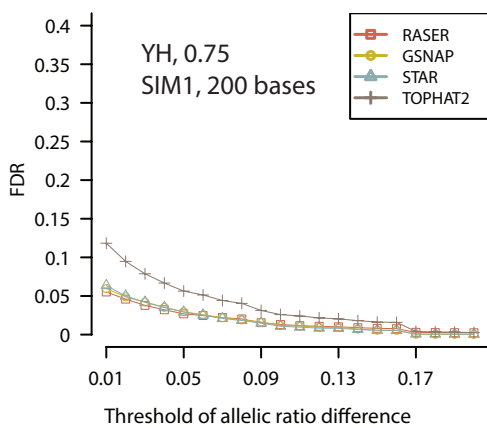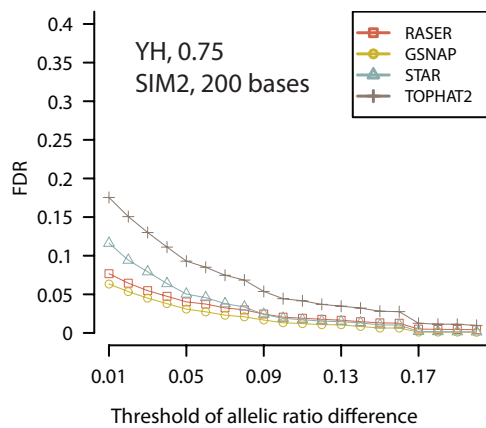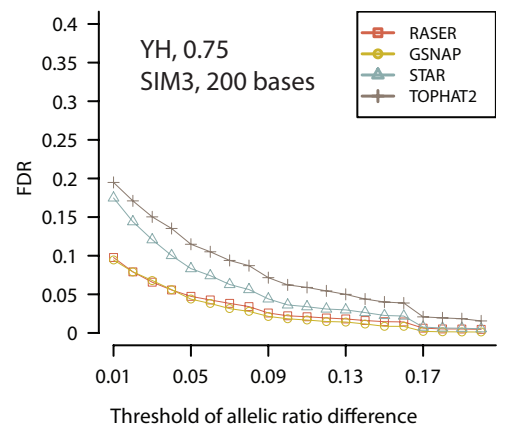

Figure S3. False discovery rate in the quantification of allelic ratios of SNPs expressed in RNA-Seq (continued).

Figure S3

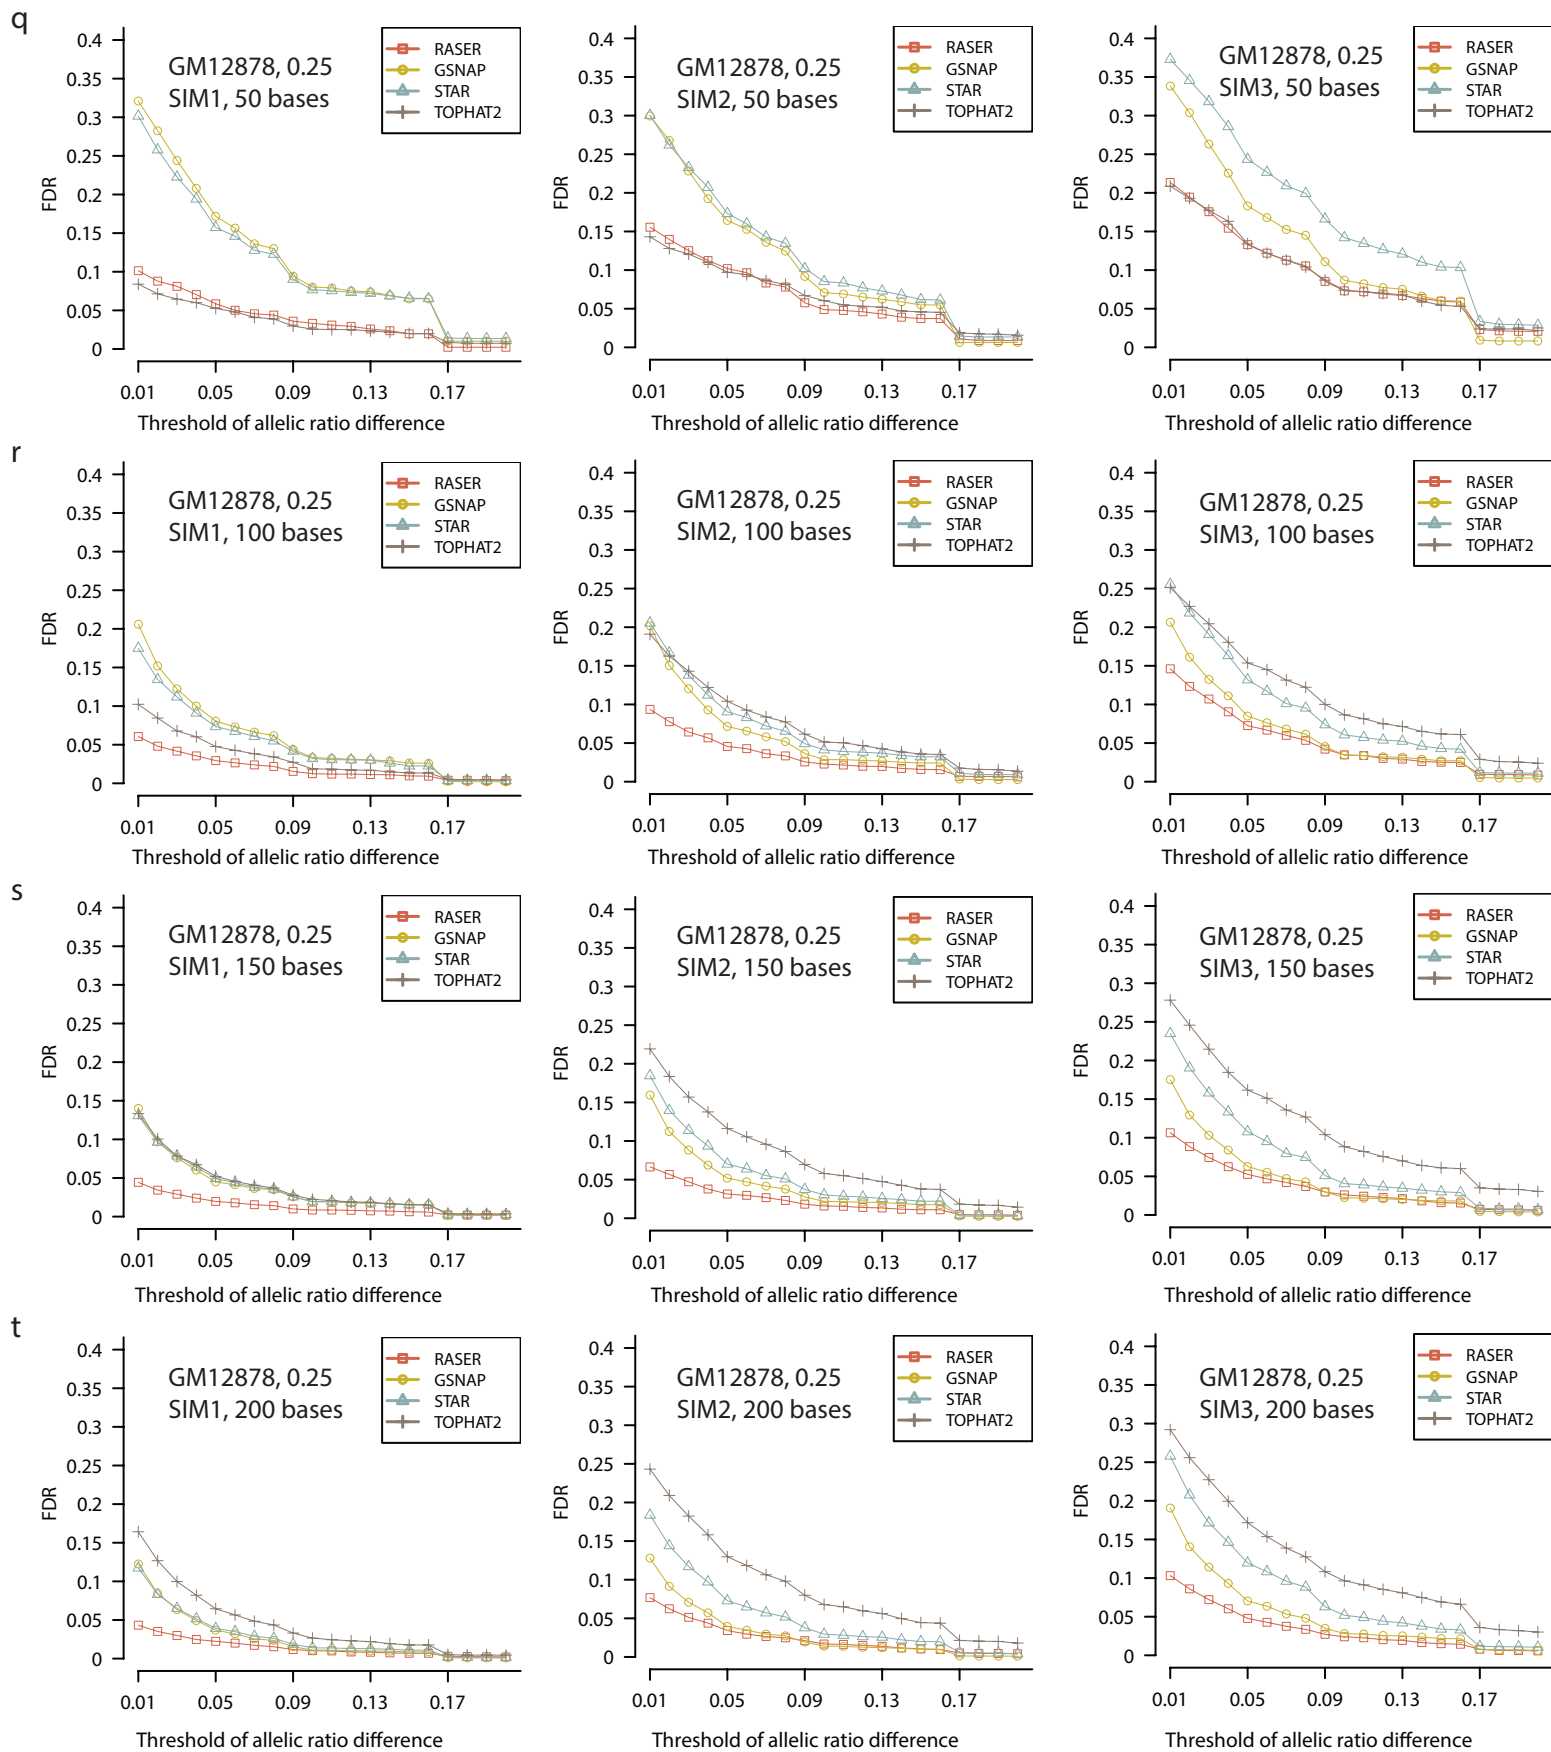

Figure S3. False discovery rate in the quantification of allelic ratios of SNPs expressed in RNA-Seq (continued).

Figure S3

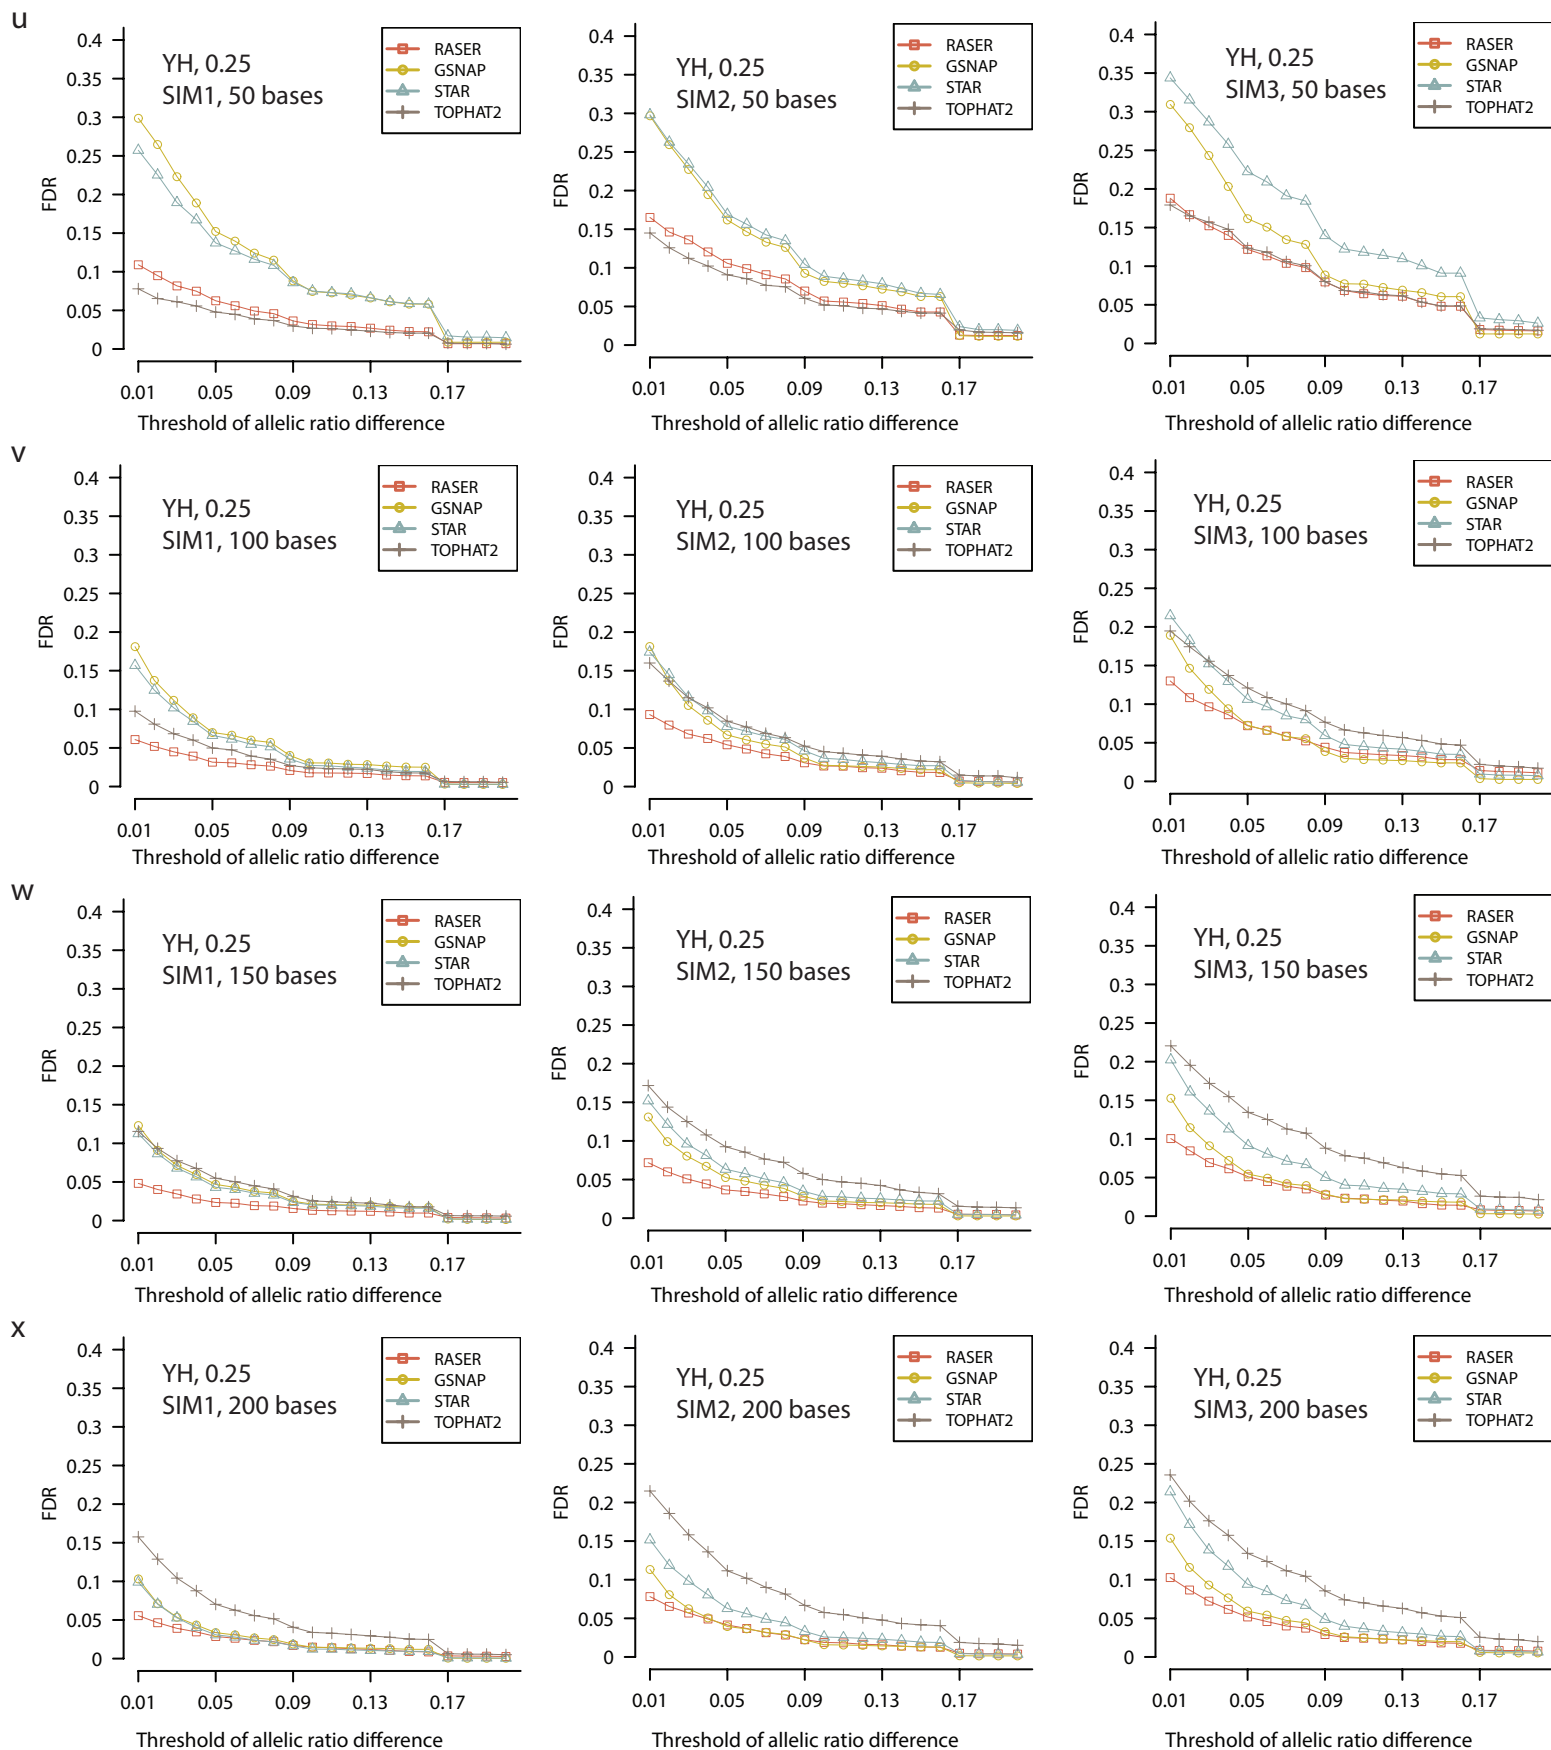

Figure S3. False discovery rate in the quantification of allelic ratios of SNPs expressed in RNA-Seq (continued).



Figure S4

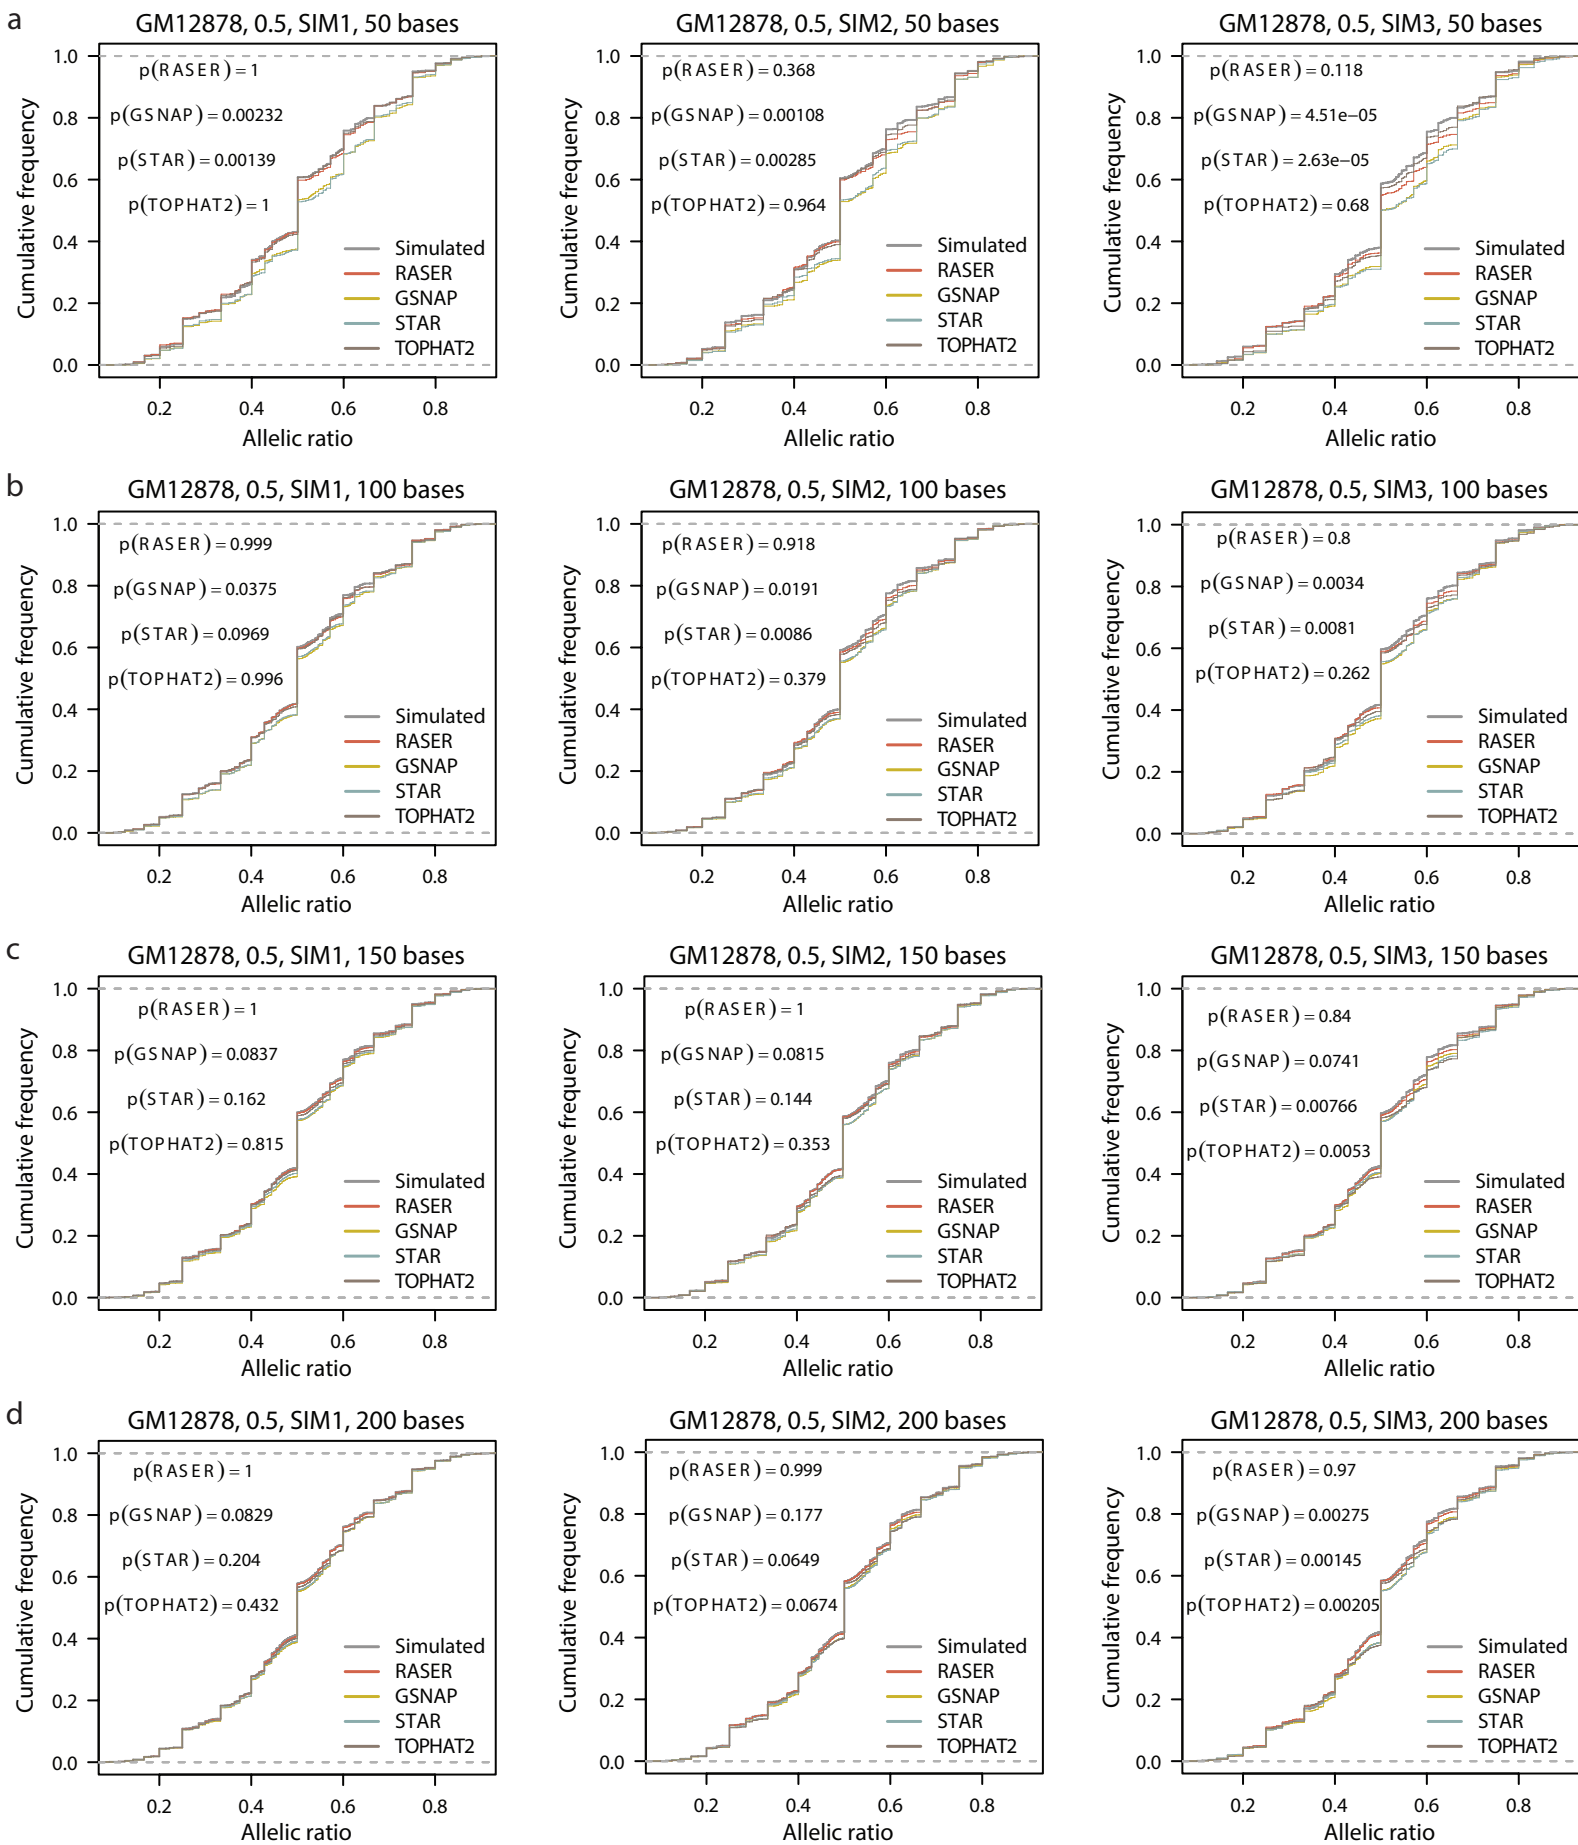

**Figure S4. Distributions of simulated and observed allelic ratios based on various read alignment algorithms.** SNPs in the GM12878 and YH samples which had corresponding whole genome sequencing data were implanted into the simulation data of 50, 100, 150 and 200 bases in length. SIM1, SIM2 and SIM3 data were used for the plots in the first, middle and last column, respectively. For each read that contains a known SNP, the probability for the SNP to have the reference or alternative allele was set to be 0.5, 0.75 and 0.25, similarly as in Figure S3. Each panel is labeled in the same way as in Figure S3. P-values were calculated using the Kolmogorov–Smirnov (KS) test between the simulated and predicted allelic ratios from each aligners. For all data sets, RASER was used with the "obviously best" mapping scheme; other aligners reported uniquely mapped reads.

Figure S4

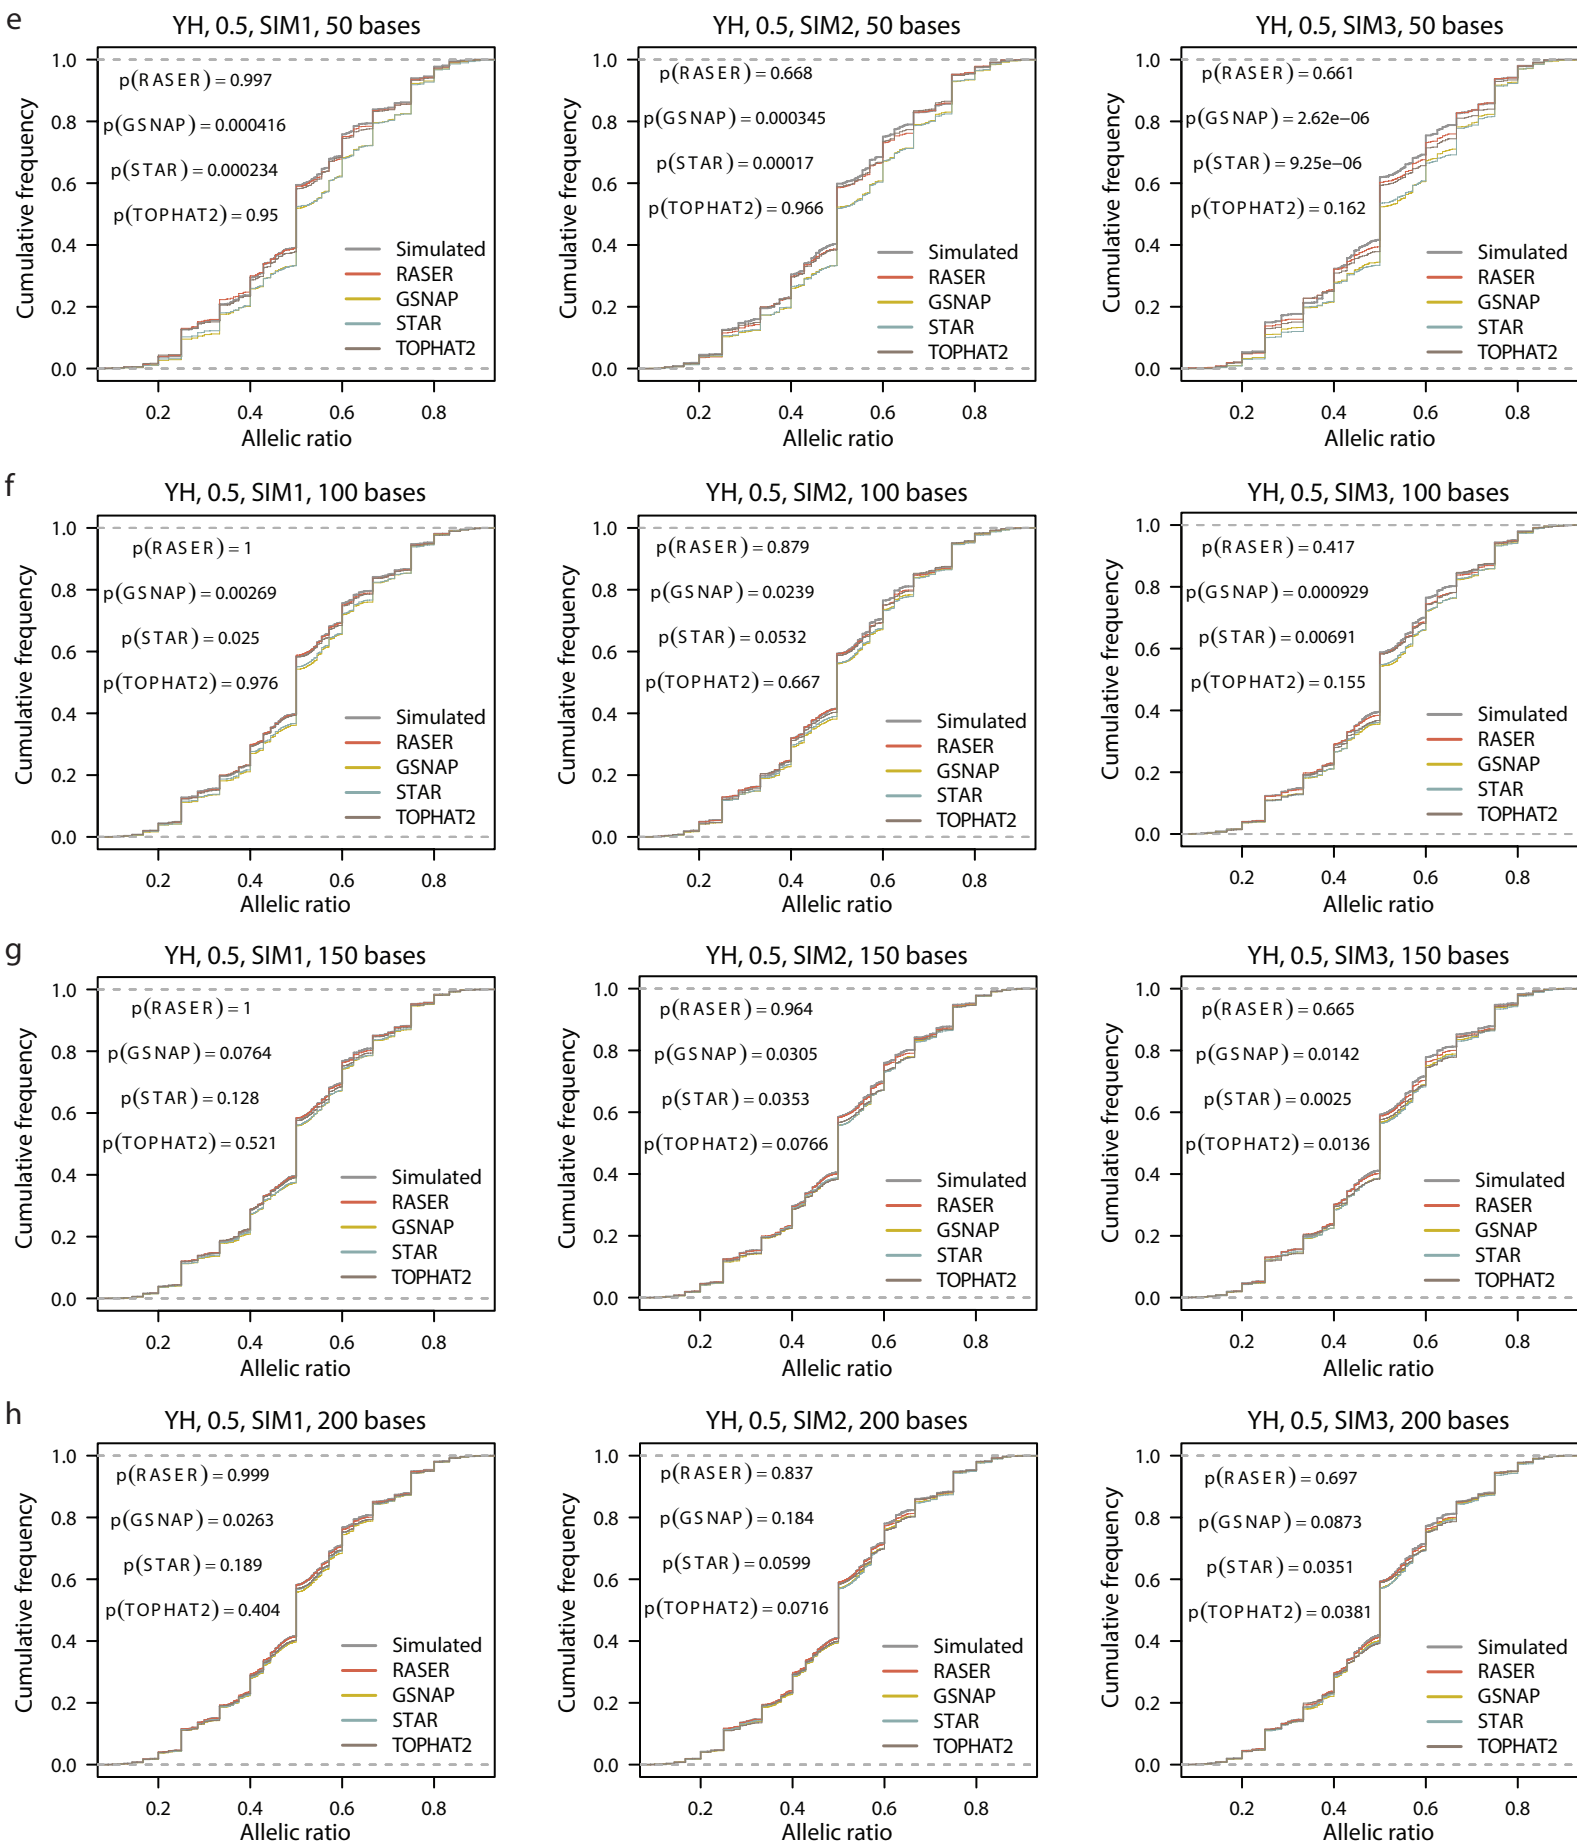

Figure S4. Distributions of simulated and observed allelic ratios based on various read alignment algorithms (continued).



Figure S4

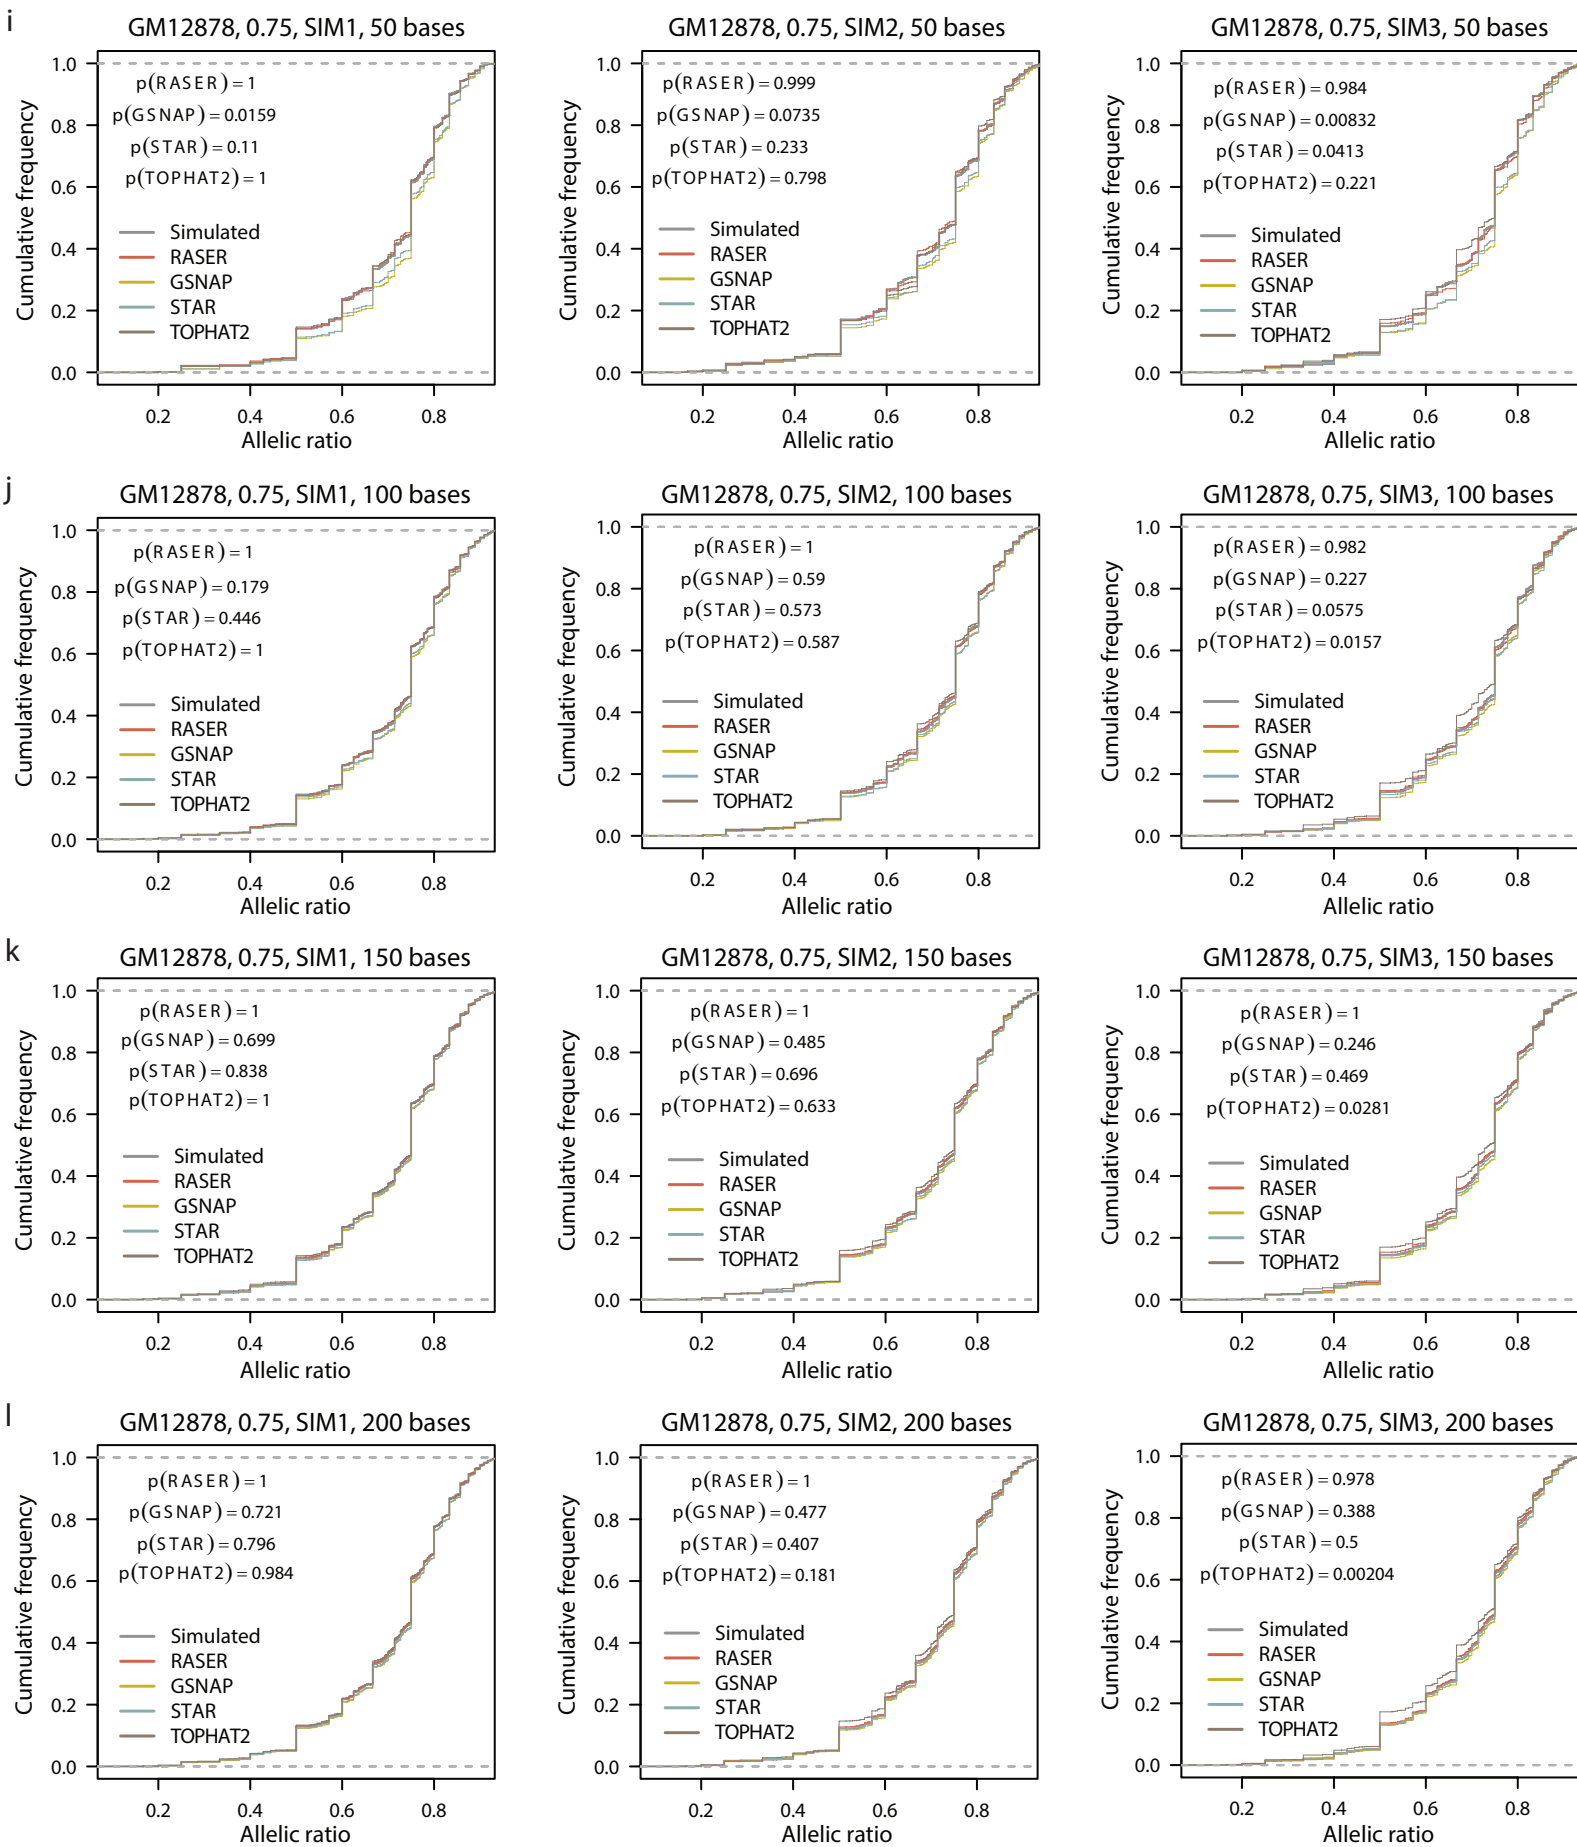

Figure S4. Distributions of simulated and observed allelic ratios based on various read alignment algorithms (continued).

Figure S4

m

YH, 0.75, SIM1, 50 bases

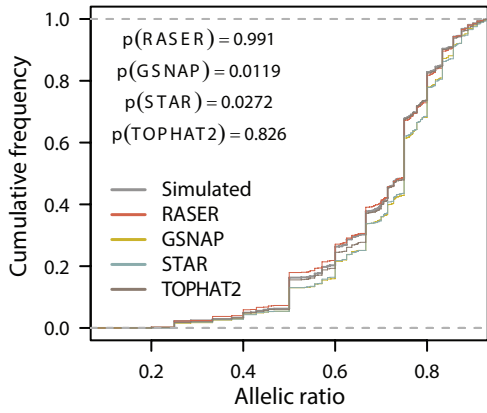

YH, 0.75, SIM2, 50 bases

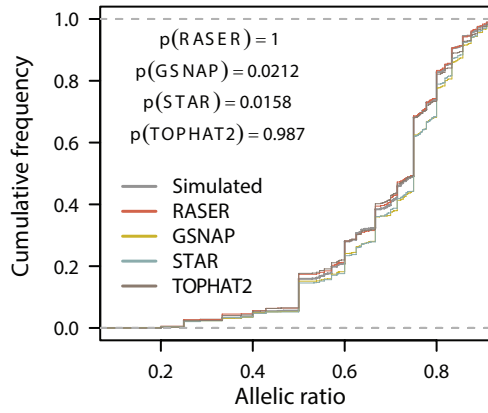

YH, 0.75, SIM3, 50 bases

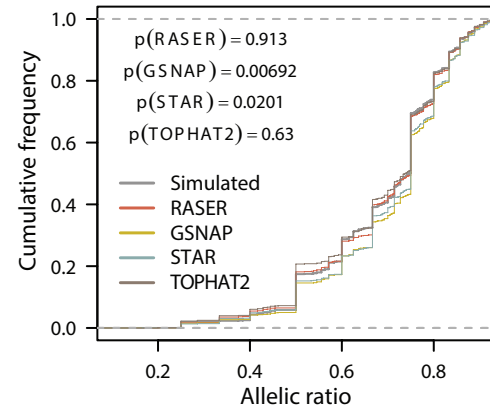

n

YH, 0.75, SIM1, 100 bases

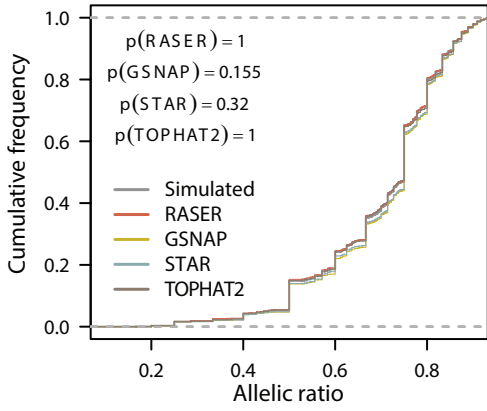

YH, 0.75, SIM2, 100 bases

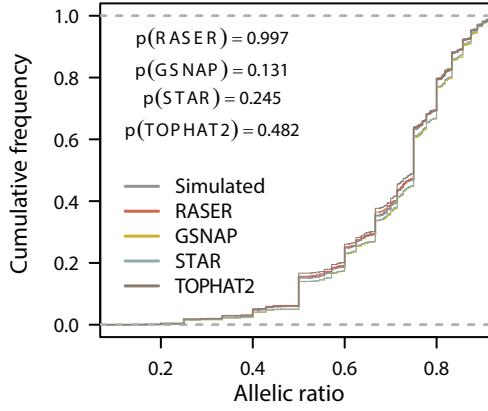

YH, 0.75, SIM3, 100 bases

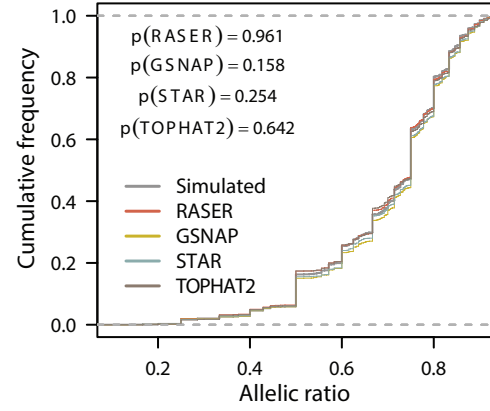

o

YH, 0.75, SIM1, 150 bases

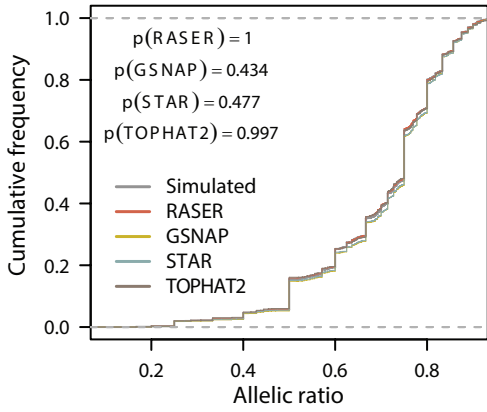

YH, 0.75, SIM2, 150 bases

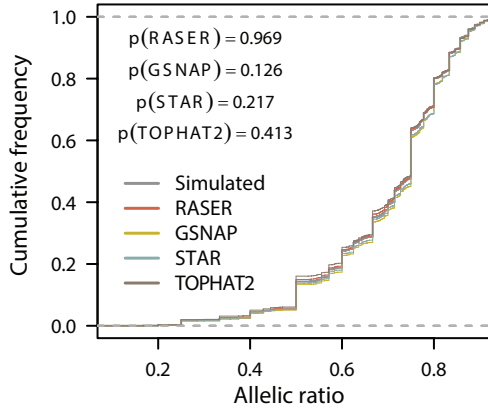

YH, 0.75, SIM3, 150 bases

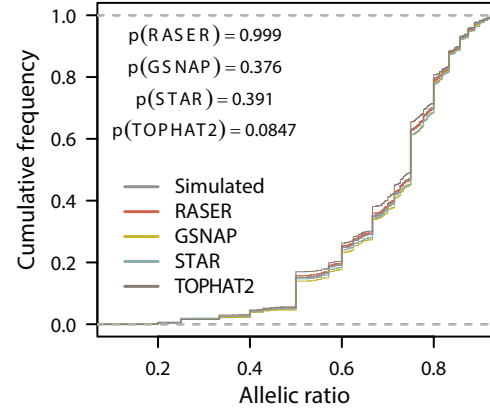

p

YH, 0.75, SIM1, 200 bases

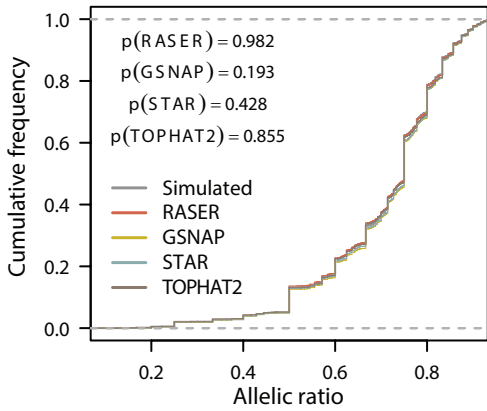

YH, 0.75, SIM2, 200 bases

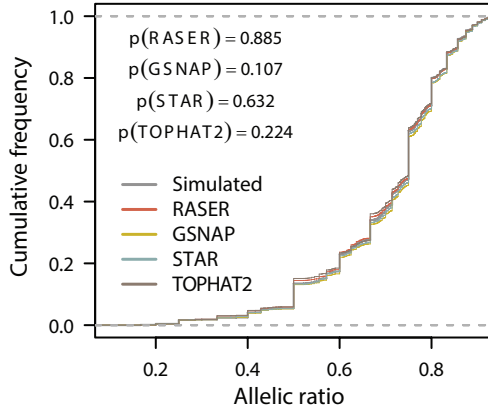

YH, 0.75, SIM3, 200 bases

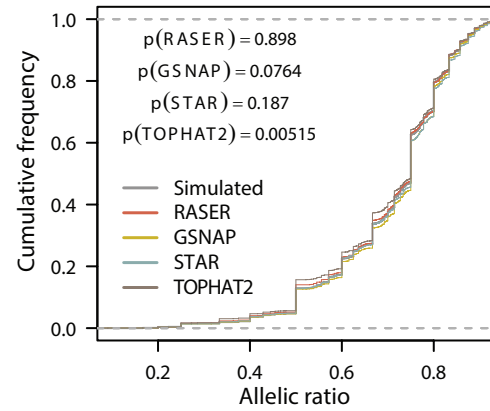

Figure S4. Distributions of simulated and observed allelic ratios based on various read alignment algorithms (continued).

Figure S4

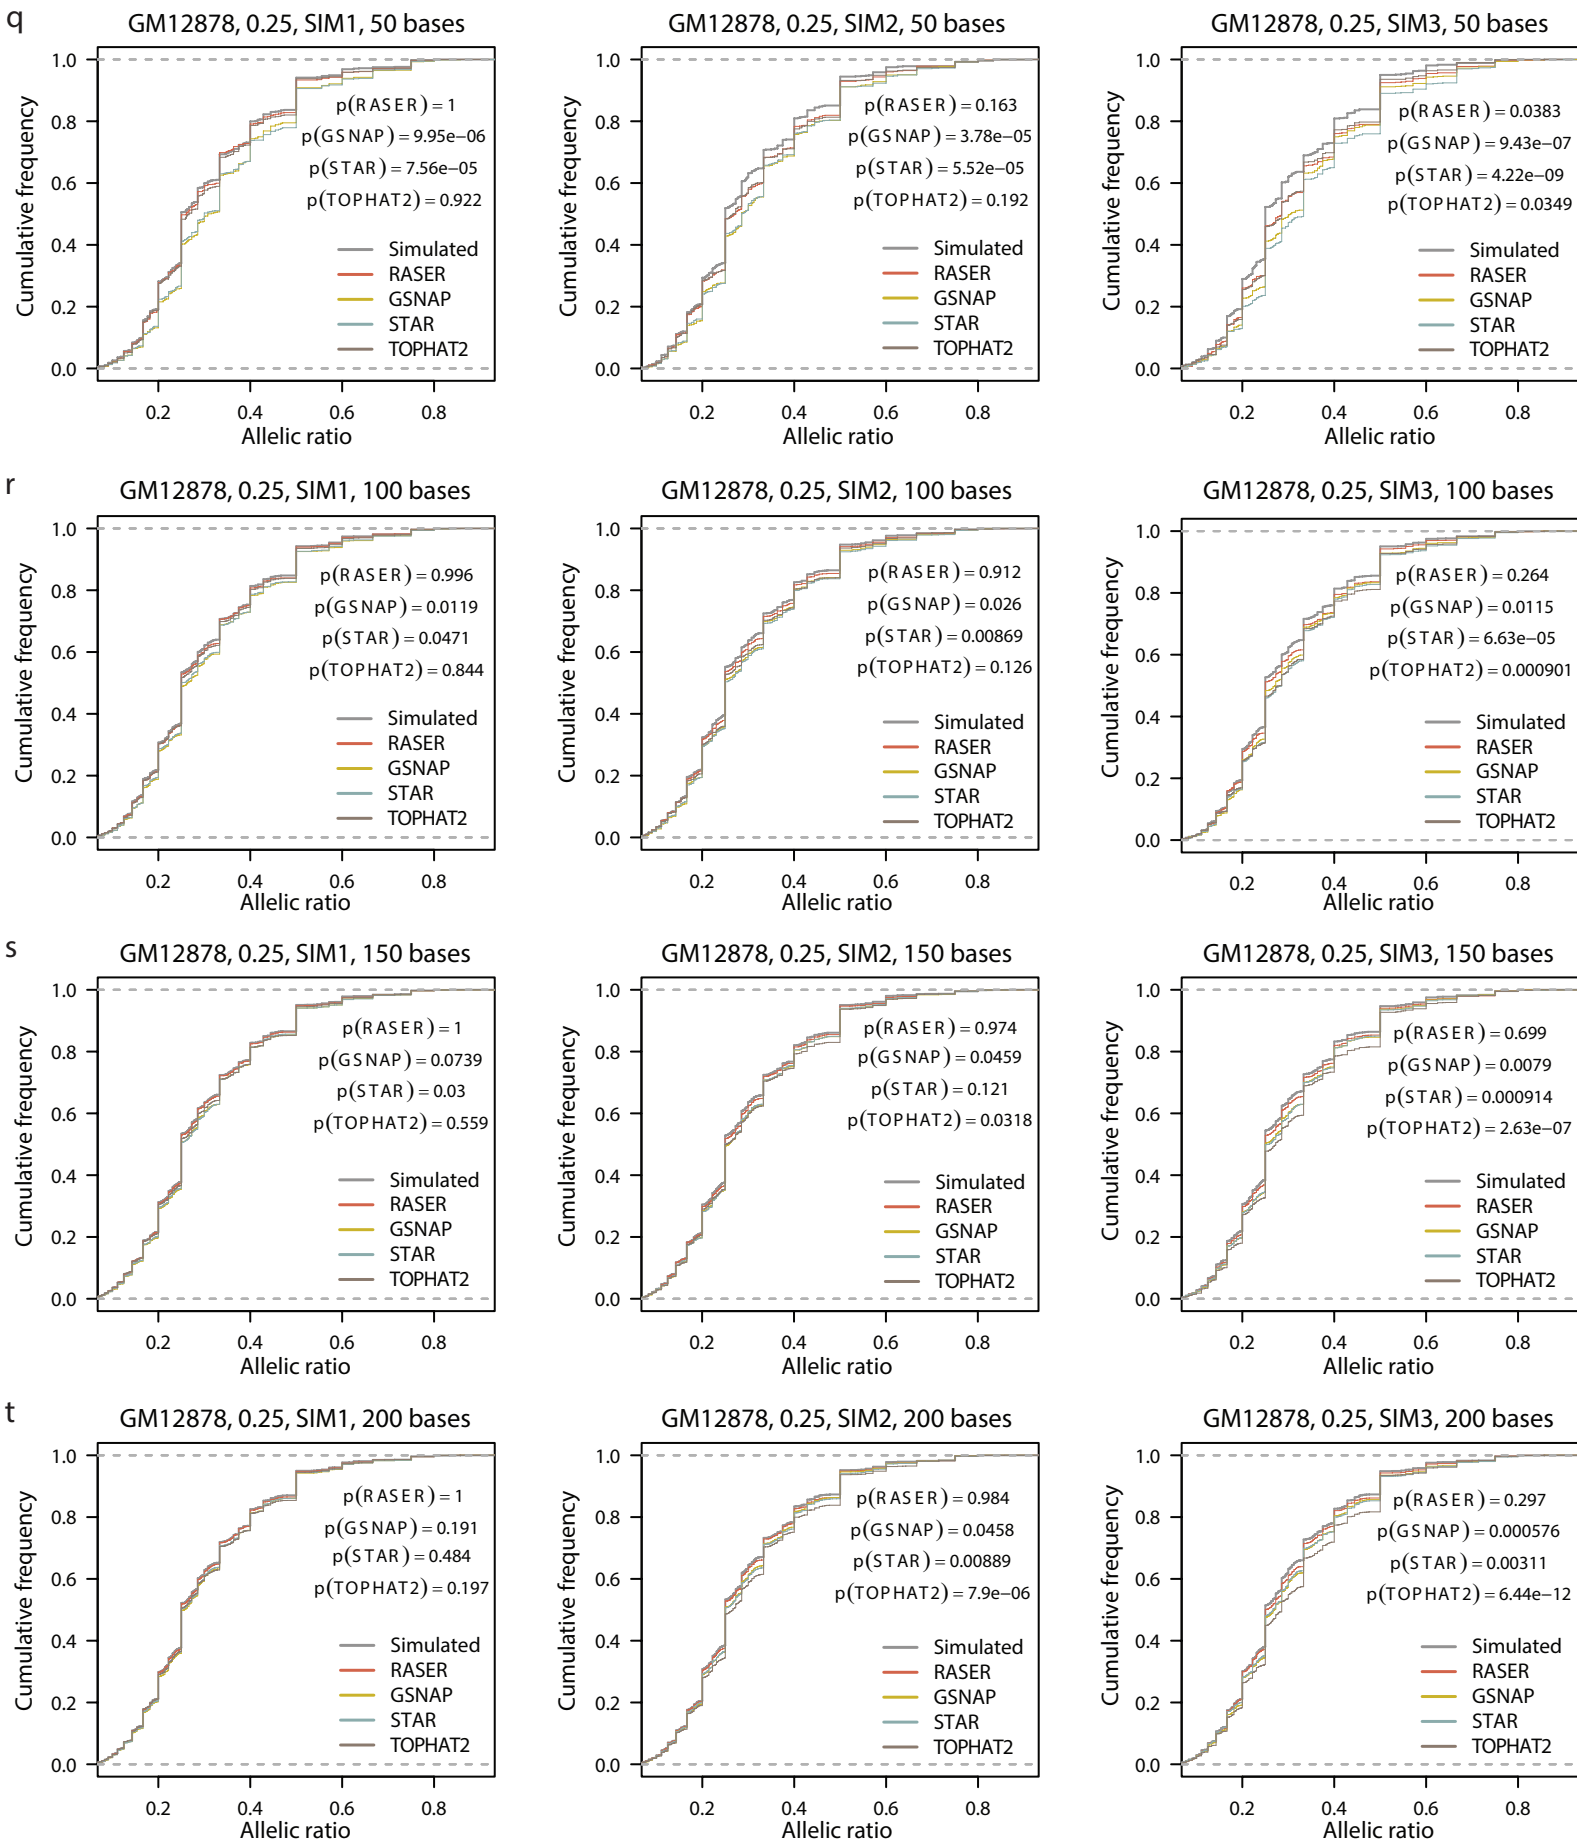

Figure S4. Distributions of simulated and observed allelic ratios based on various read alignment algorithms (continued).

Figure S4

U

YH, 0.25, SIM1, 50 bases

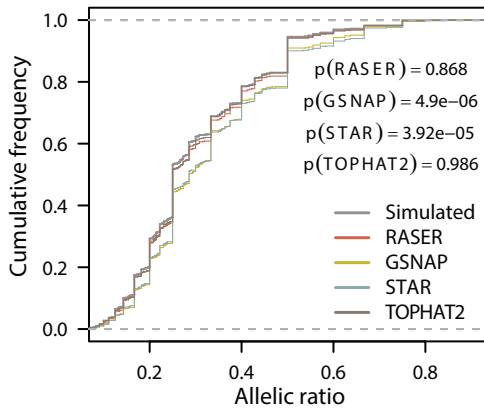

YH, 0.25, SIM2, 50 bases

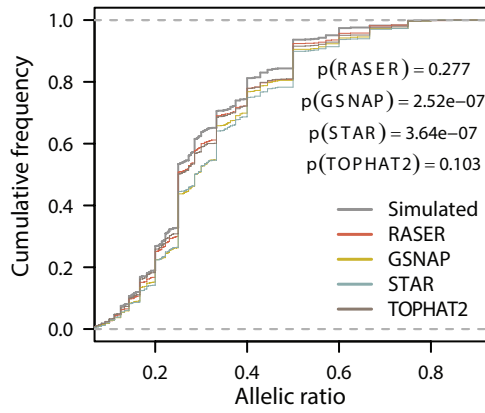

YH, 0.25, SIM3, 50 bases

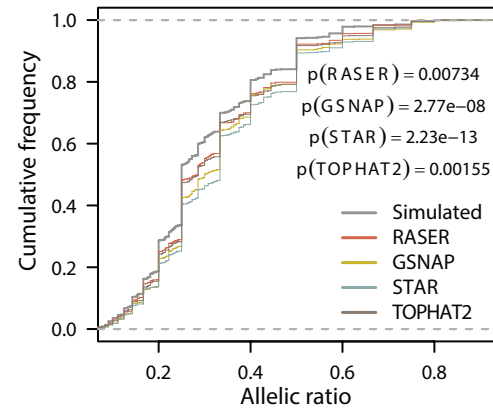

V

YH, 0.25, SIM1, 100 bases

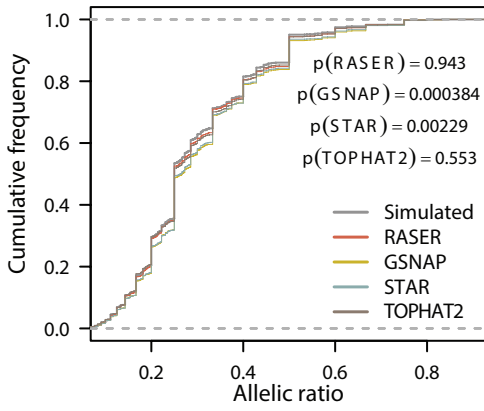

YH, 0.25, SIM2, 100 bases

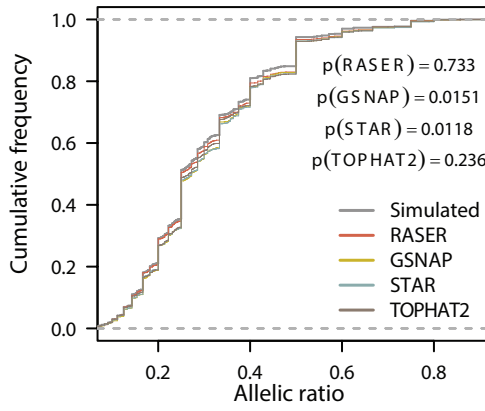

YH, 0.25, SIM3, 100 bases

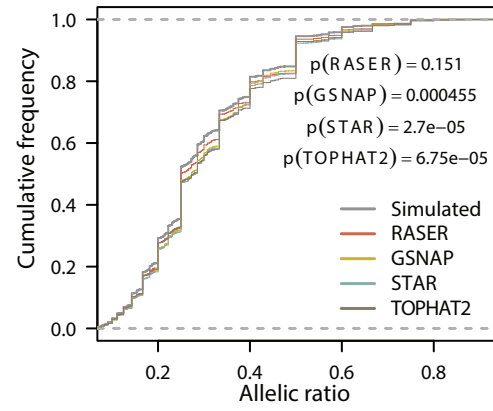

W

YH, 0.25, SIM1, 150 bases

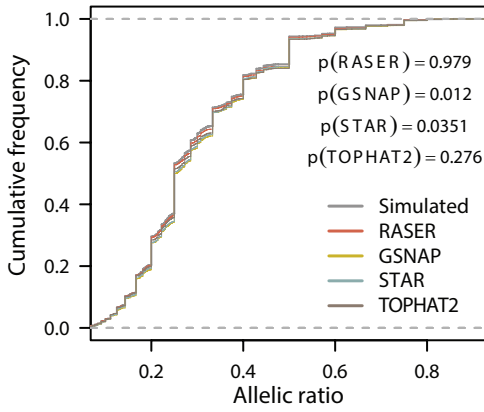

YH, 0.25, SIM2, 150 bases

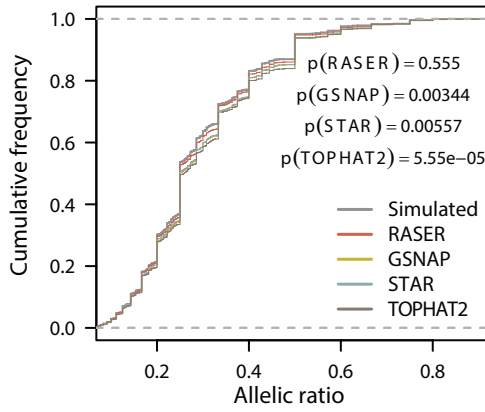

YH, 0.25, SIM3, 150 bases

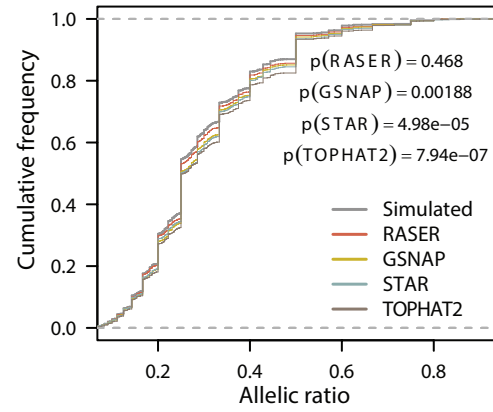

X

YH, 0.25, SIM1, 200 bases

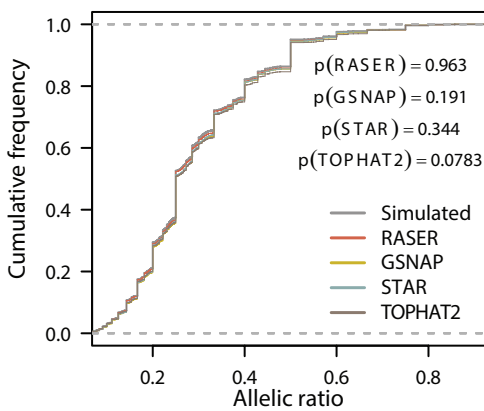

YH, 0.25, SIM2, 200 bases

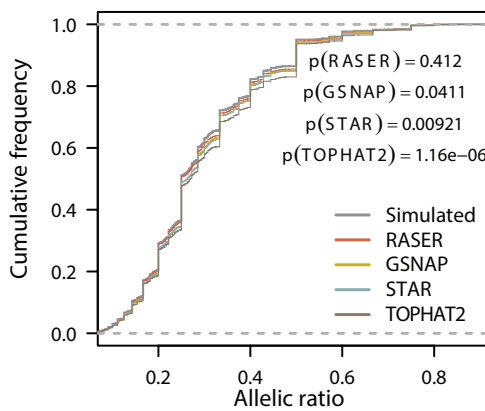

YH, 0.25, SIM3, 200 bases

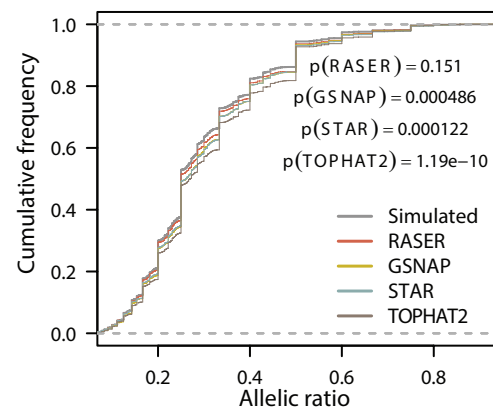

Figure S4. Distributions of simulated and observed allelic ratios based on various read alignment algorithms (continued).

Figure S5

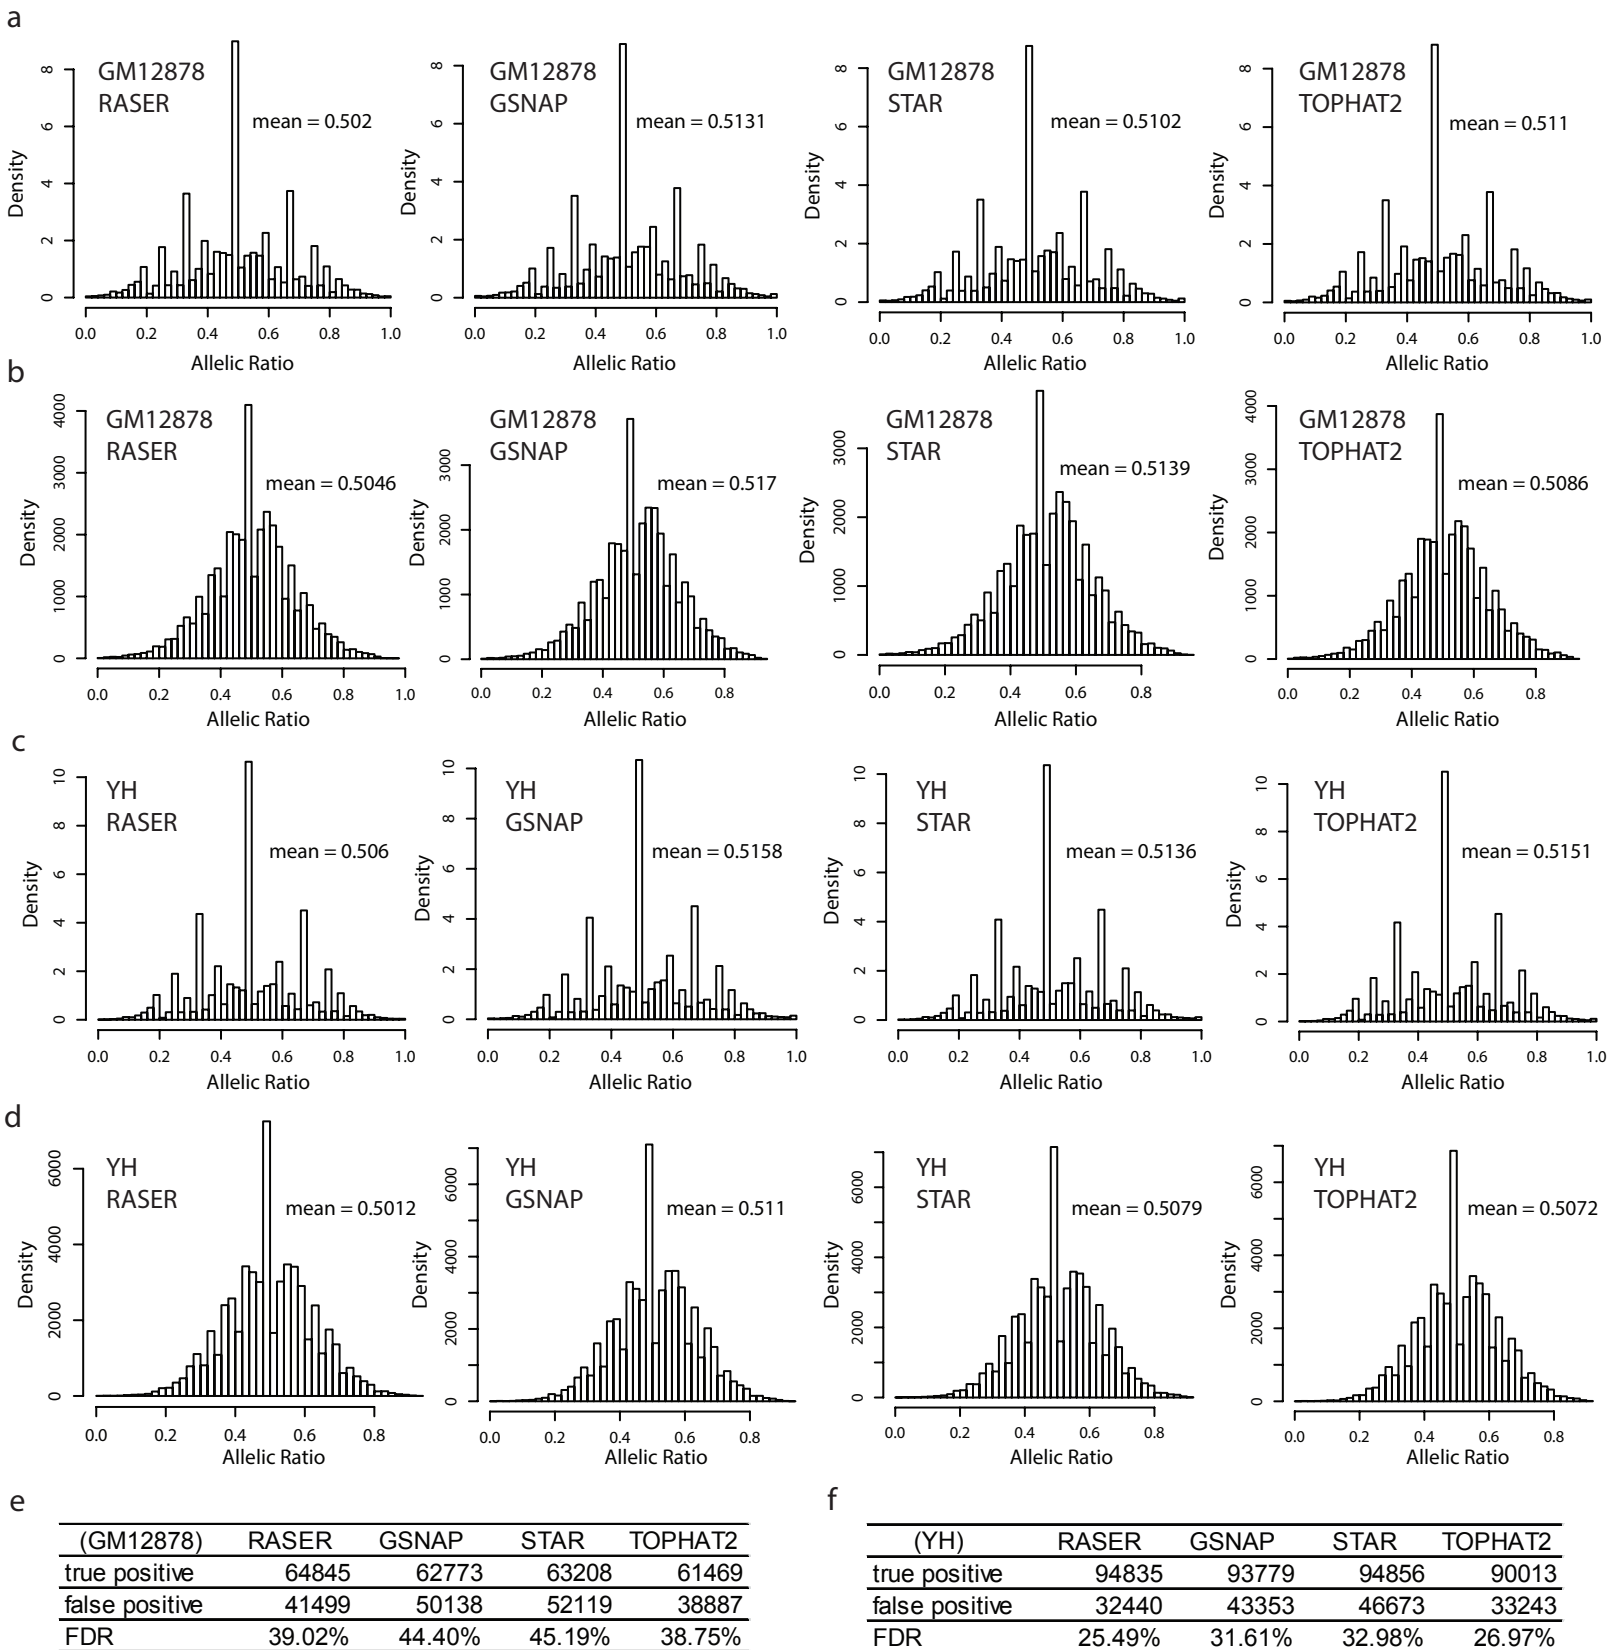

**Figure S5. Distribution of allelic ratios of heterozygous SNPs in the GM12878 or YH data sets calculated using reads mapped by different alignment algorithms.** For (a) and (c), customized post-mapping filters were applied prior to calculation of allelic ratios, including removal of duplicated mappings, removal of reads where the mismatches (corresponding to SNPs) were (1) within 5nt of read ends or (2) with Sanger base quality less than 30, and removal of SNPs with less than 5 reads. We calculated allelic ratios of the remaining mismatches. For (b) and (d), we applied GATK (with default parameters) to the mapping results and calculated allelic ratios of detected SNPs. Allelic ratios were defined as (number of reads harboring the reference allele / total number of reads overlapping the SNP). (e) Performance of aligners in SNP calling based on GATK using GM12878 data. True positives were defined as correctly detected SNPs by GATK when compared to known GM12878; false positives were defined as SNPs which 1) do not overlap with known GM12878 SNPs, and 2) do not overlap with known human editing sites from the RADAR database (Ramaswami and Li, 2014) and 3) have more than 20 mapped reads. The false discovery rate (FDR) was calculated as  $\# \text{false positives} / (\# \text{true positives} + \# \text{false positives})$ . (f) Similar as (e), for YH data. For all data sets, RASER was used with the "obviously best" mapping scheme; other aligners reported uniquely mapped reads.

Figure S6

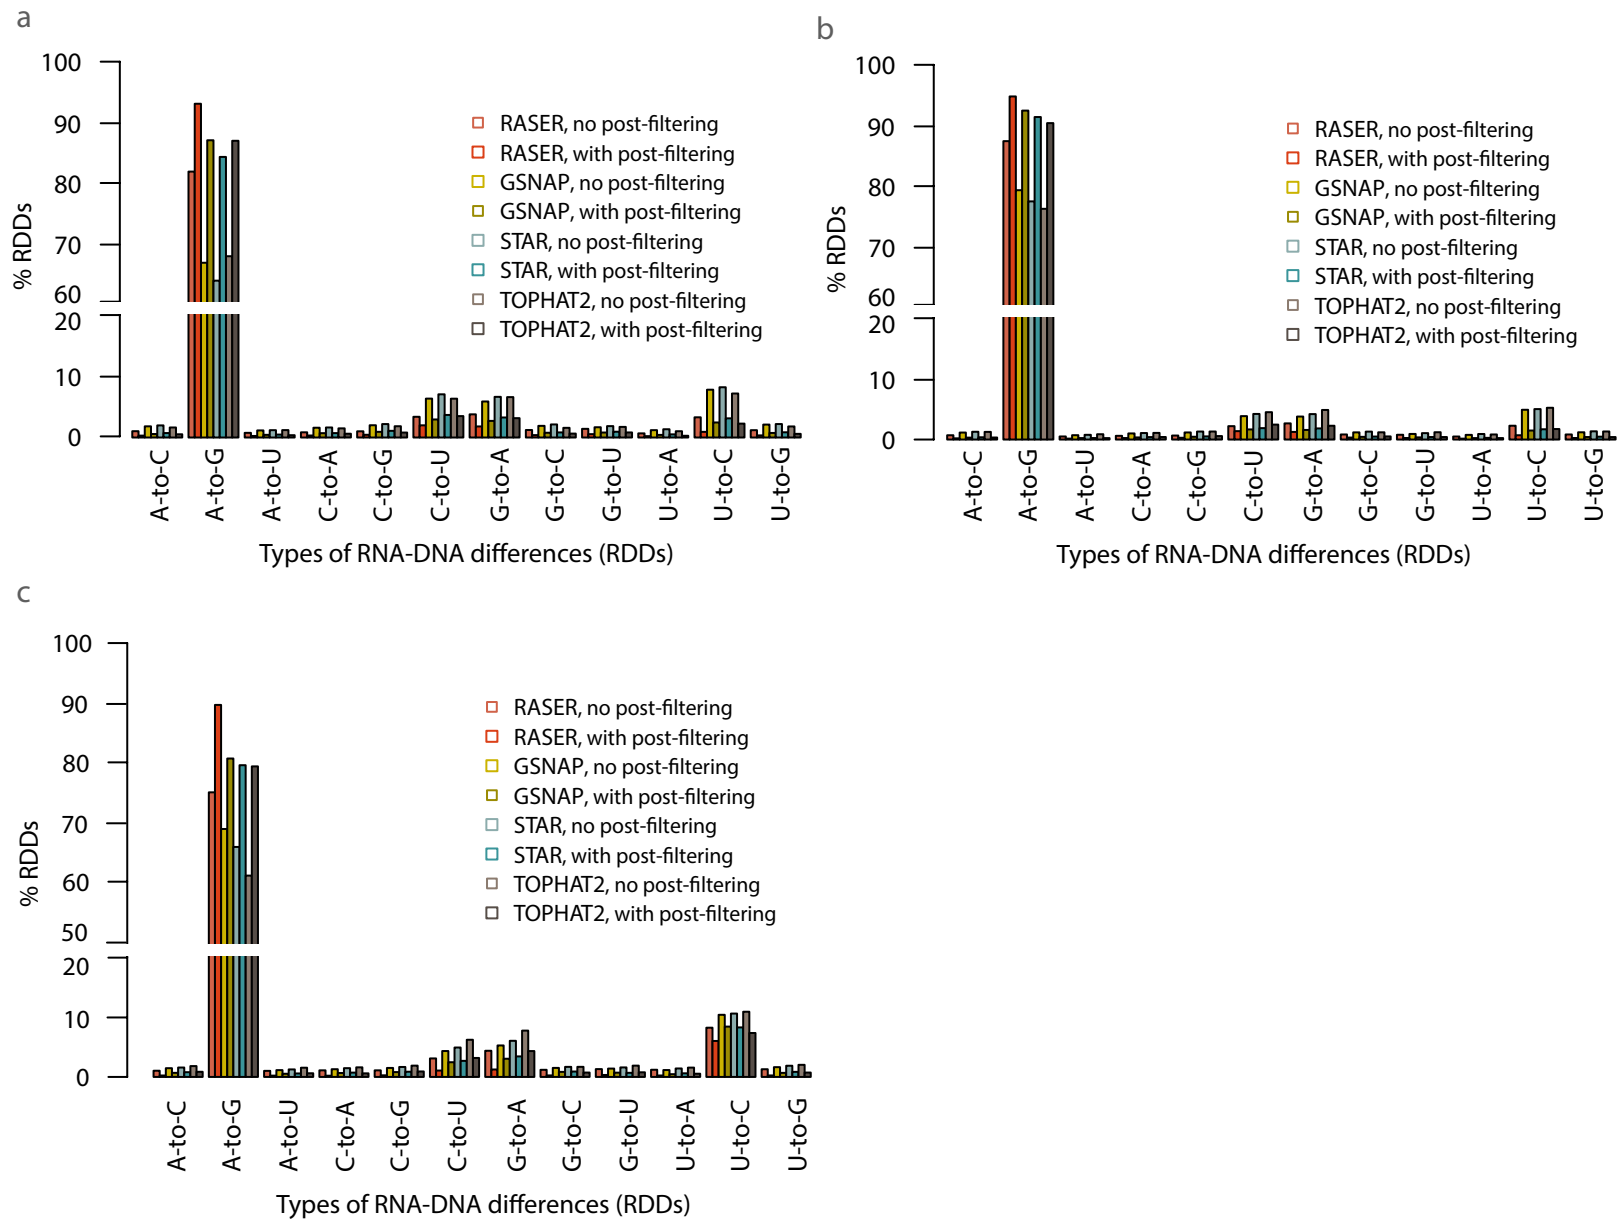

**Figure S6. Identification of RNA editing sites in (a) K562, (b) GM12878 and (c) YH data sets.** Y axis shows percentage of different types of RNA-DNA differences (RDDs) among all RDDs identified by each aligner, prior to and after post-mapping artifact filtering, respectively. The artifact filters remove RDDs sites that satisfy one of the following: 1) covered by reads with a strand bias, 2) with 100% editing, 3) with low-editing levels (<10% or <3 edited reads), 4) close to splice sites (i.e.,  $\leq 4$  nt from spliced junctions), 5) within simple repeats (defined by Repeatmasker), 6) within homopolymer repeats (Repeatmasker), 7) overlapping known SNPs in public databases (dbSNP) (see Lee et al 2013 for details of these filters). For all data sets, RASER was used with the "obviously best" mapping scheme; other aligners reported uniquely mapped reads.

Figure S7

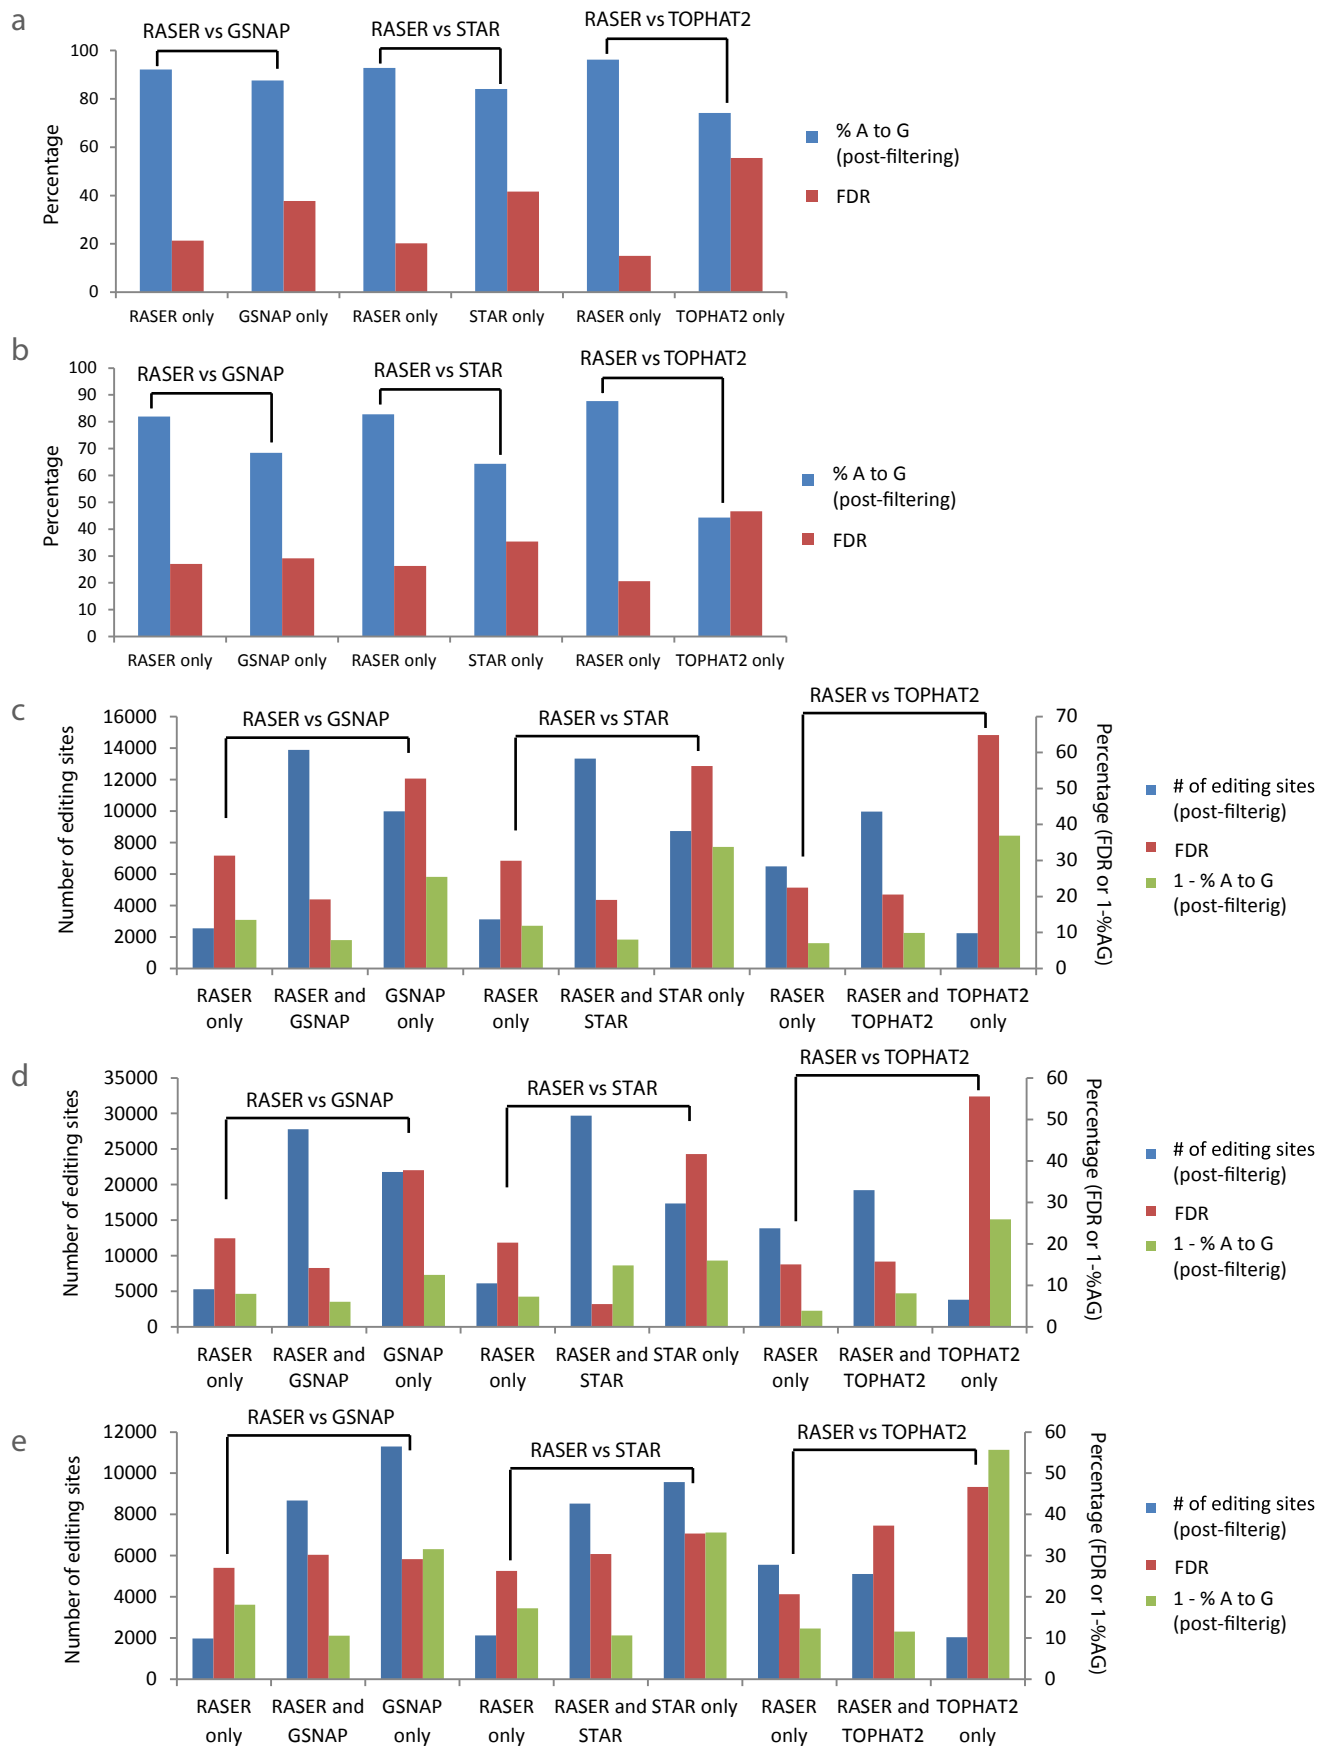

**Figure S7 . Performance comparison of aligners in identifying RNA editing sites.** (a) Percentage of A-to-G editing sites (blue) and FDR values (red) in analyzing GM12878 data. FDR is defined as the percentage of originally predicted editing sites that were removed by the filters which remove RDDs sites as described in Figure S6. RASER was compared to each of the other 3 aligners individually. Editing sites that were only identified by RASER (RASER only) or only by the other aligner are shown. (b) Similar as (a), but using YH data. (c) Number of editing sites (blue), FDR (red, as defined in (a)) and percentage of non-A-to-G editing sites (green, possible false positives) are shown. K562 data were analyzed. Similarly as in (a), RASER was compared to each of the other aligners. Editing sites were grouped into: "RASER only" (those that were identified only by RASER), "RASER and GSNAP" (those that were identified by both aligners) and "GSNAP only" (those there were identified only by GSNP), similarly for STAR and TOPHAT2. (d) Similar as (c), but for GM12878 data. (e) Similar as (c), but for YH data. For all data sets, RASER was used with the "obviously best" mapping scheme; other aligners reported uniquely mapped reads.







Figure S8

2. For READ1, READ1\_RC, READ2, READ2\_RC,
- 3) Merge fragments from all windows

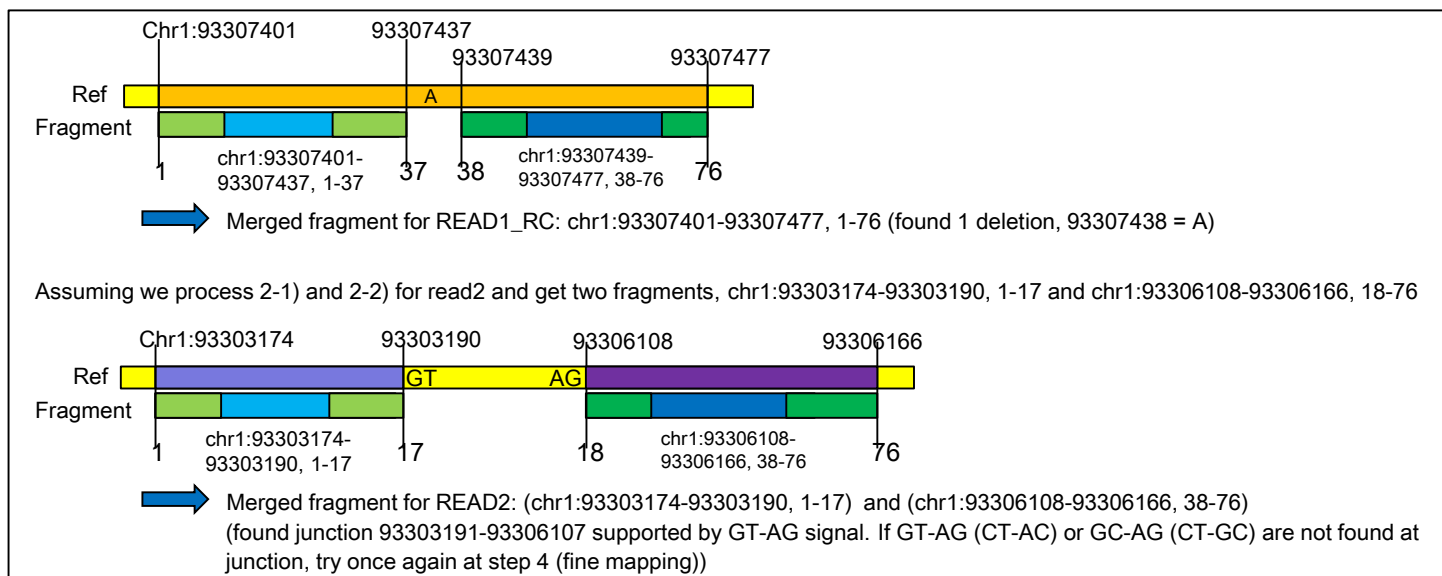

3. For merged fragments from (READ1 and READ2\_RC) and (READ2 and (READ1\_RC)), get merged fragments pair which are within insert size

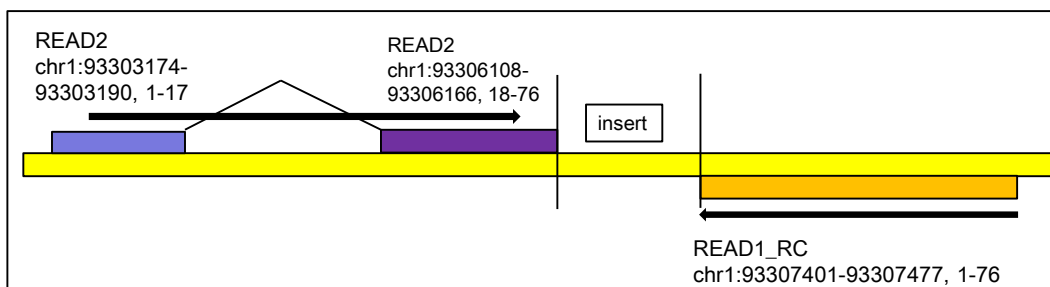

4. Fine mapping of merged fragment pair with Smith-Waterman algorithm – minimizing mapping score (by mismatches and indels) and finding splicing signals (GT-AG (CT-AC) or GC-AG (CT-GC)) at splicing junctions, if they were not found at step 2-3) (splicing junctions are reported even if splicing signals are not found).

```
<READ1_RC>
93307401                                     93307477
.. TCAGGAGCGGGCTGCTGAGAGCTAAACCCAGCAATTTTCTGATTTTTTCAGATATAGATAATAAACTTATGAACAGCAACT..
  GGGCGGGCTGCTGAGAGCTAAACCCAGCAATTTTCT-TGATTTTTTCACATATAGATAATAAACTTATGAACAGCA
  1                                           76

<READ2>
93303174   93303190   93306108                                     93306166
.. ACAGCGTAACCTCCAGACATGGT.....AGATGGAGGAGATGTATAAGAAAGCTCATGCTGCTATACGGAGAATCCAGTCTATGAAAAGAA..
  GCGTAACCTCCAGACATG      ATGGAGGAGATGTATAAGAAAGCTCATGCTGCTATACGGAGAATCCAGTCTATGAAAA
  1           17       18                                           76
```

5. Report merged fragments pair

```
READ1  83  chr1  93307401  37M1D39M  =  93303174  -4304
GGGGCGGGCTGCTGAGAGCTAAACCCAGCAATTTTCTGATTTTTTCACATATAGATAATAAACTTATGAACAGCA
GIIHHHHIIGHHIGDIHHHHHHHHHHHHHHHHHHHHHHHHHHHHHHHHHHHHHHHHHHHHHHHHHHHHHHHHHHHHHH
* MD:Z:2A34^C11G27 NH:i:1 HI:i:1 NM:i:* AS:i:0.03947

READ2  163  chr1  93303174  17M2917N59M  =  93307401  4304
GCGTAACCTCCAGACATGATGGAGGAGATGTATAAGAAAGCTCATGCTGCTATACGGAGAATCCAGTCTATGAAA
IIIIIIIIIIIIIIIIIIIIIIIIIIIIIIIIIIIIIIIIIIIIIIIIIIIIIIIIIIIIIIIIIIIIIIIIIIII
* MD:Z:55A20 NH:i:1 HI:i:1 NM:i:* AS:i:0.01315
```

Figure S8. Flow of the entire alignment process using example 76 bp paired end reads (continued).

**Table S1. Mapping results for simulated and actual RNA-Seq data sets.**

|                                         |                      | RASER<br>(obviously best) | GSNAP<br>(unique) | STAR<br>(unique) | TOPHAT2<br>(unique) |
|-----------------------------------------|----------------------|---------------------------|-------------------|------------------|---------------------|
| 50bps                                   | SIM1 (1M read pairs) | 943,552                   | 998,449           | 983,562          | 857,462             |
|                                         | SIM2 (1M read pairs) | 898,789                   | 994,506           | 972,622          | 762,305             |
|                                         | SIM3 (1M read pairs) | 817,034                   | 984,233           | 940,661          | 650,775             |
| 100bps                                  | SIM1 (1M read pairs) | 984,581                   | 996,540           | 993,619          | 929,975             |
|                                         | SIM2 (1M read pairs) | 961,401                   | 995,977           | 989,543          | 815,562             |
|                                         | SIM3 (1M read pairs) | 909,735                   | 993,279           | 973,519          | 680,089             |
| 150bps                                  | SIM1 (1M read pairs) | 991,290                   | 998,711           | 996,795          | 931,644             |
|                                         | SIM2 (1M read pairs) | 970,215                   | 998,844           | 992,713          | 779,501             |
|                                         | SIM3 (1M read pairs) | 914,822                   | 993,461           | 971,627          | 624,705             |
| 200bps                                  | SIM1 (1M read pairs) | 990,101                   | 999,563           | 997,208          | 915,554             |
|                                         | SIM2 (1M read pairs) | 970,153                   | 996,031           | 987,130          | 731,583             |
|                                         | SIM3 (1M read pairs) | 939,190                   | 997,567           | 969,593          | 569,369             |
| GM12878 (#raw read pairs = 223,216,889) |                      | 133,625,444               | 168,617,704       | 173,524,596      | 135,232,645         |
| K562 (#raw read pairs = 213,271,407)    |                      | 124,073,580               | 159,540,180       | 164,359,963      | 125,115,501         |
| YH (#raw read pairs = 161,803,471)      |                      | 102,365,610               | 132,786,247       | 133,830,768      | 100,221,747         |
